# Supplementary material for: Brassinin Induces Apoptosis, Autophagy, and Paraptosis via MAPK Signaling Pathway Activation in Chronic Myelogenous Leukemia Cells
Source: MDPI journal article supplement (doi:10.3390/biology12020307), 2023-02-14

Fig.S1

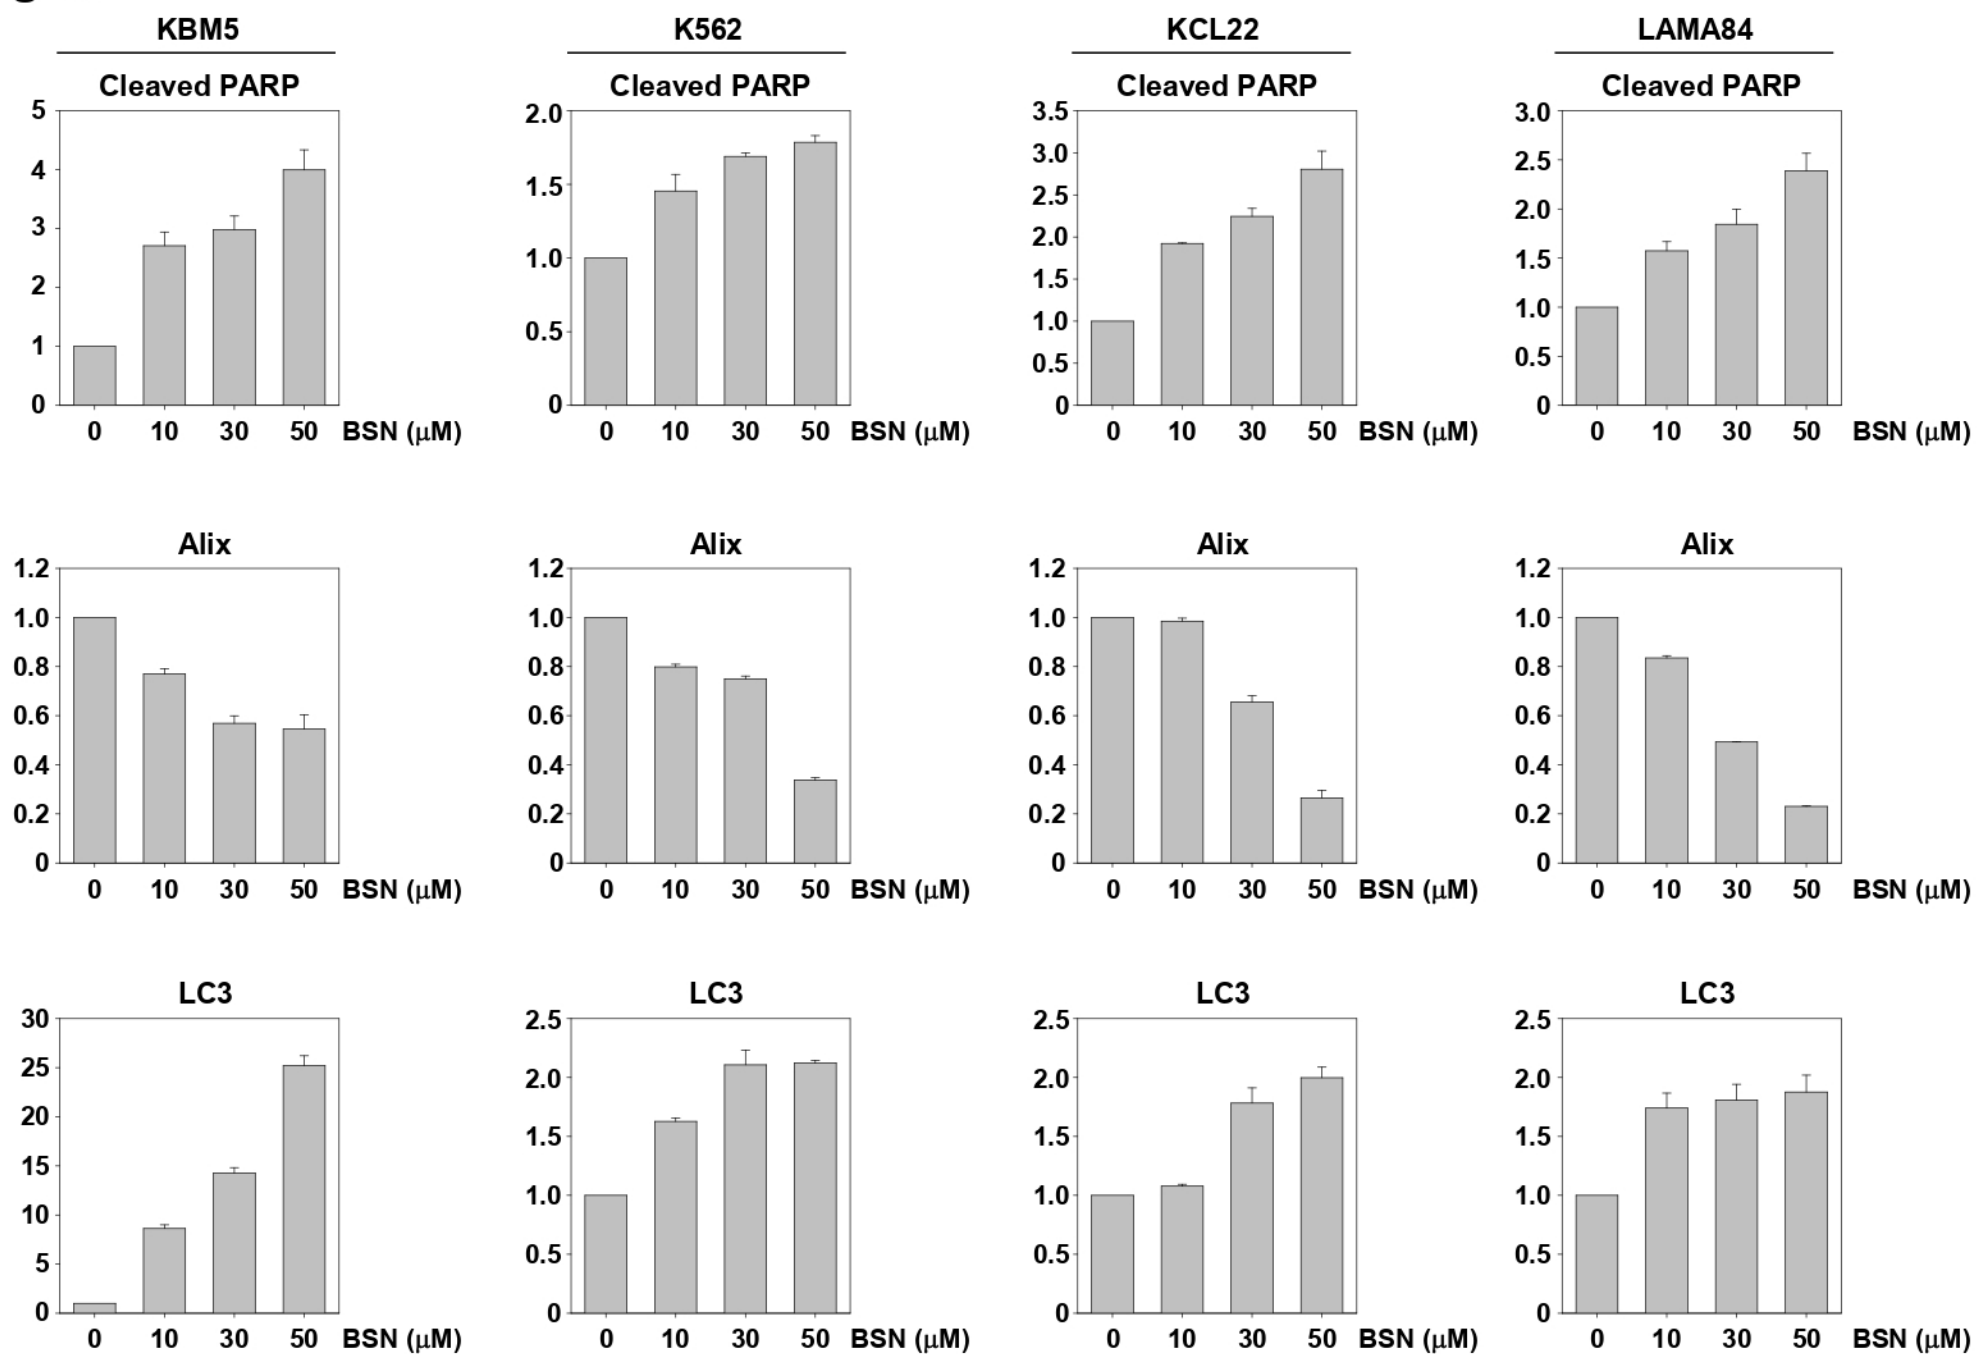

**Fig. S2**

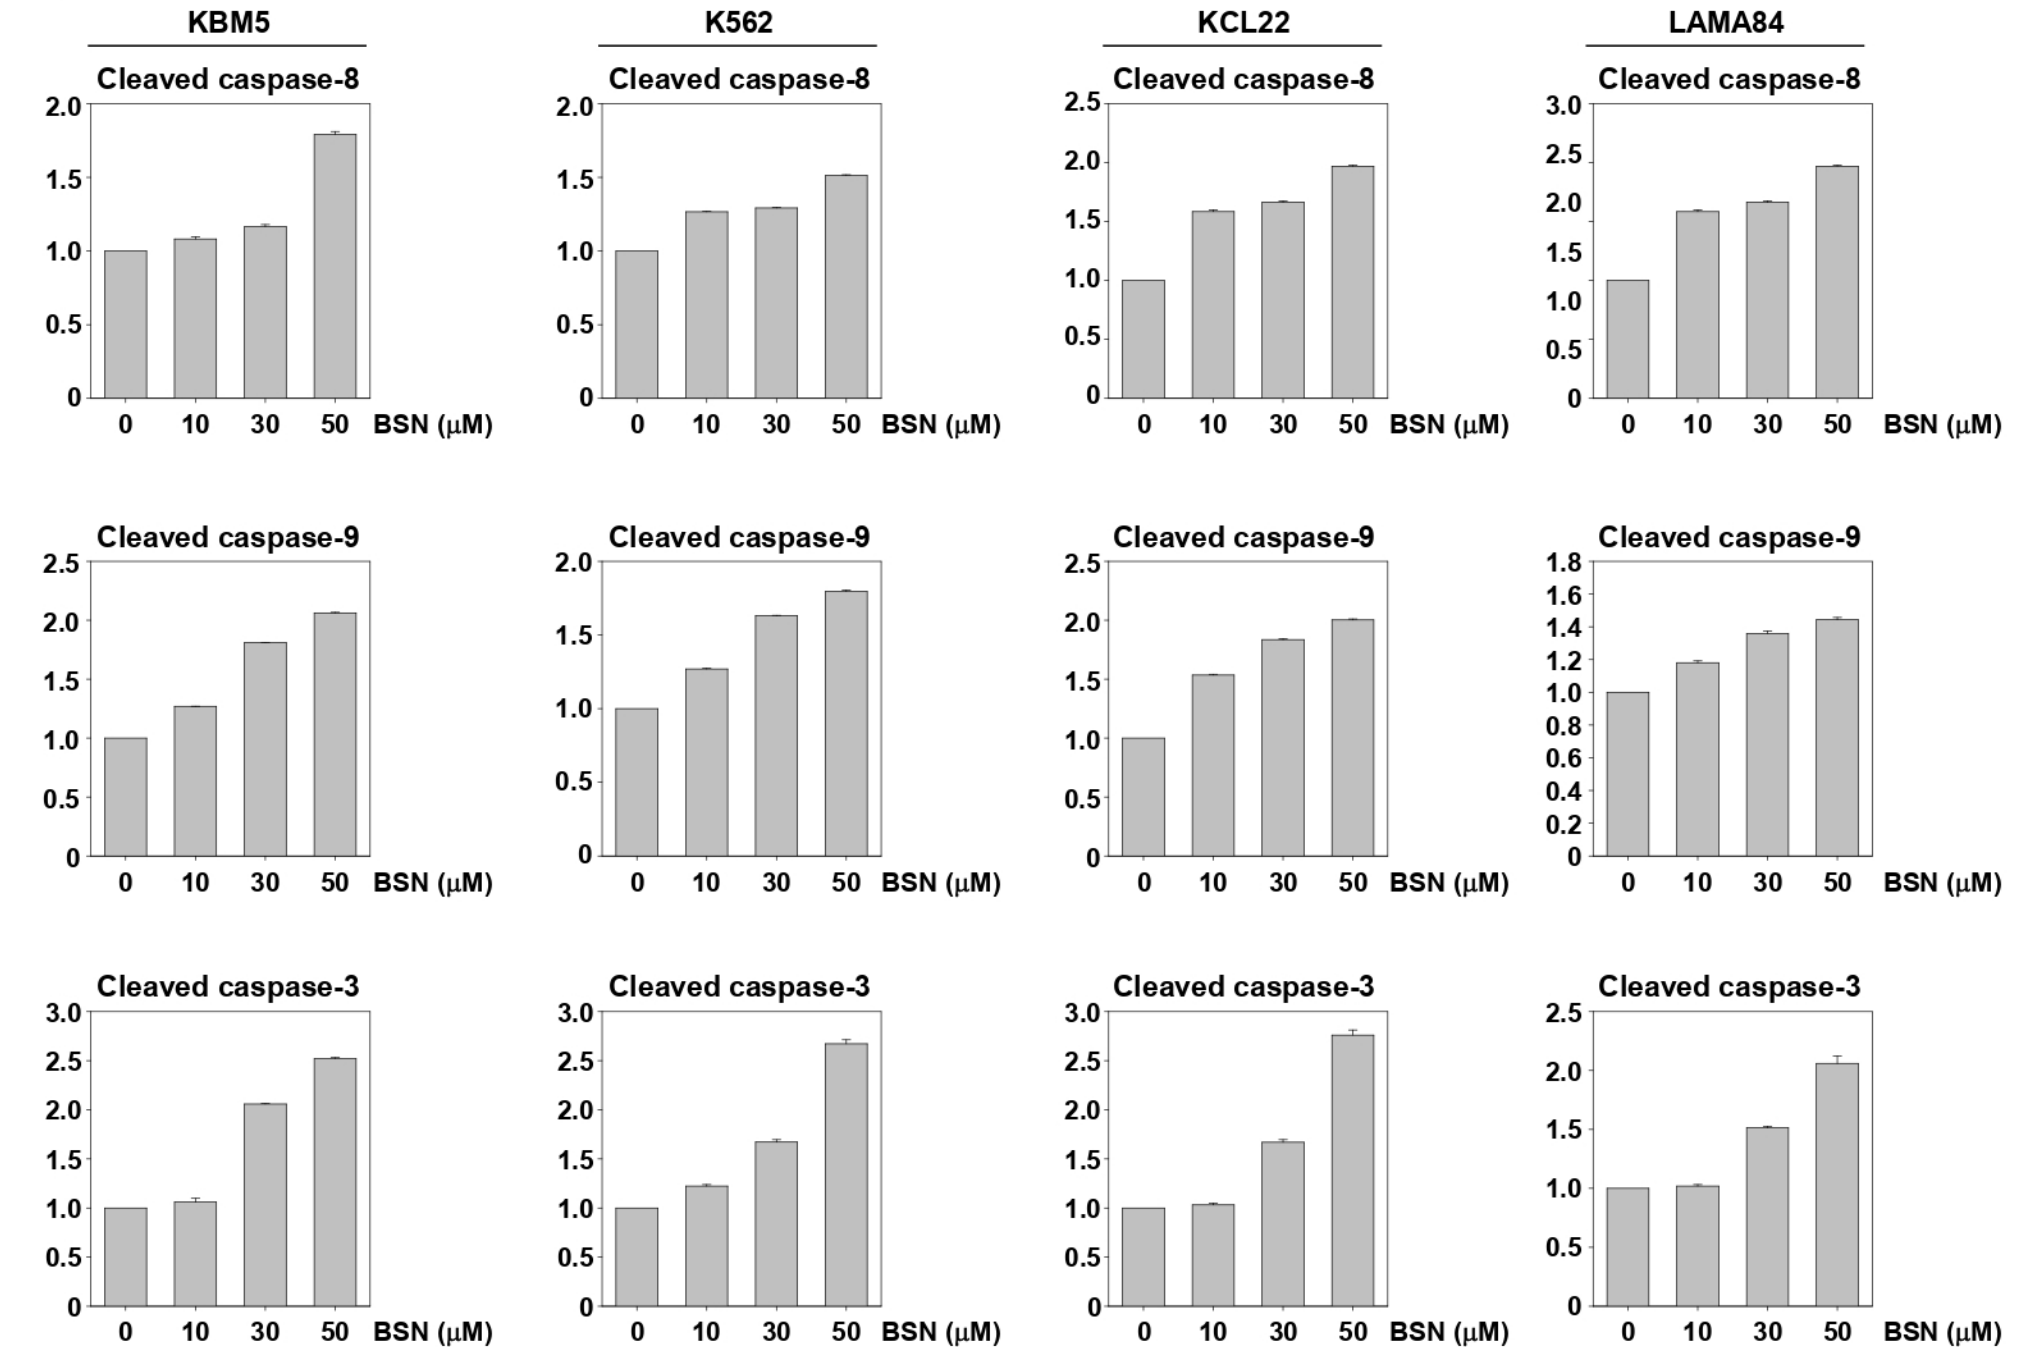

Fig.S3

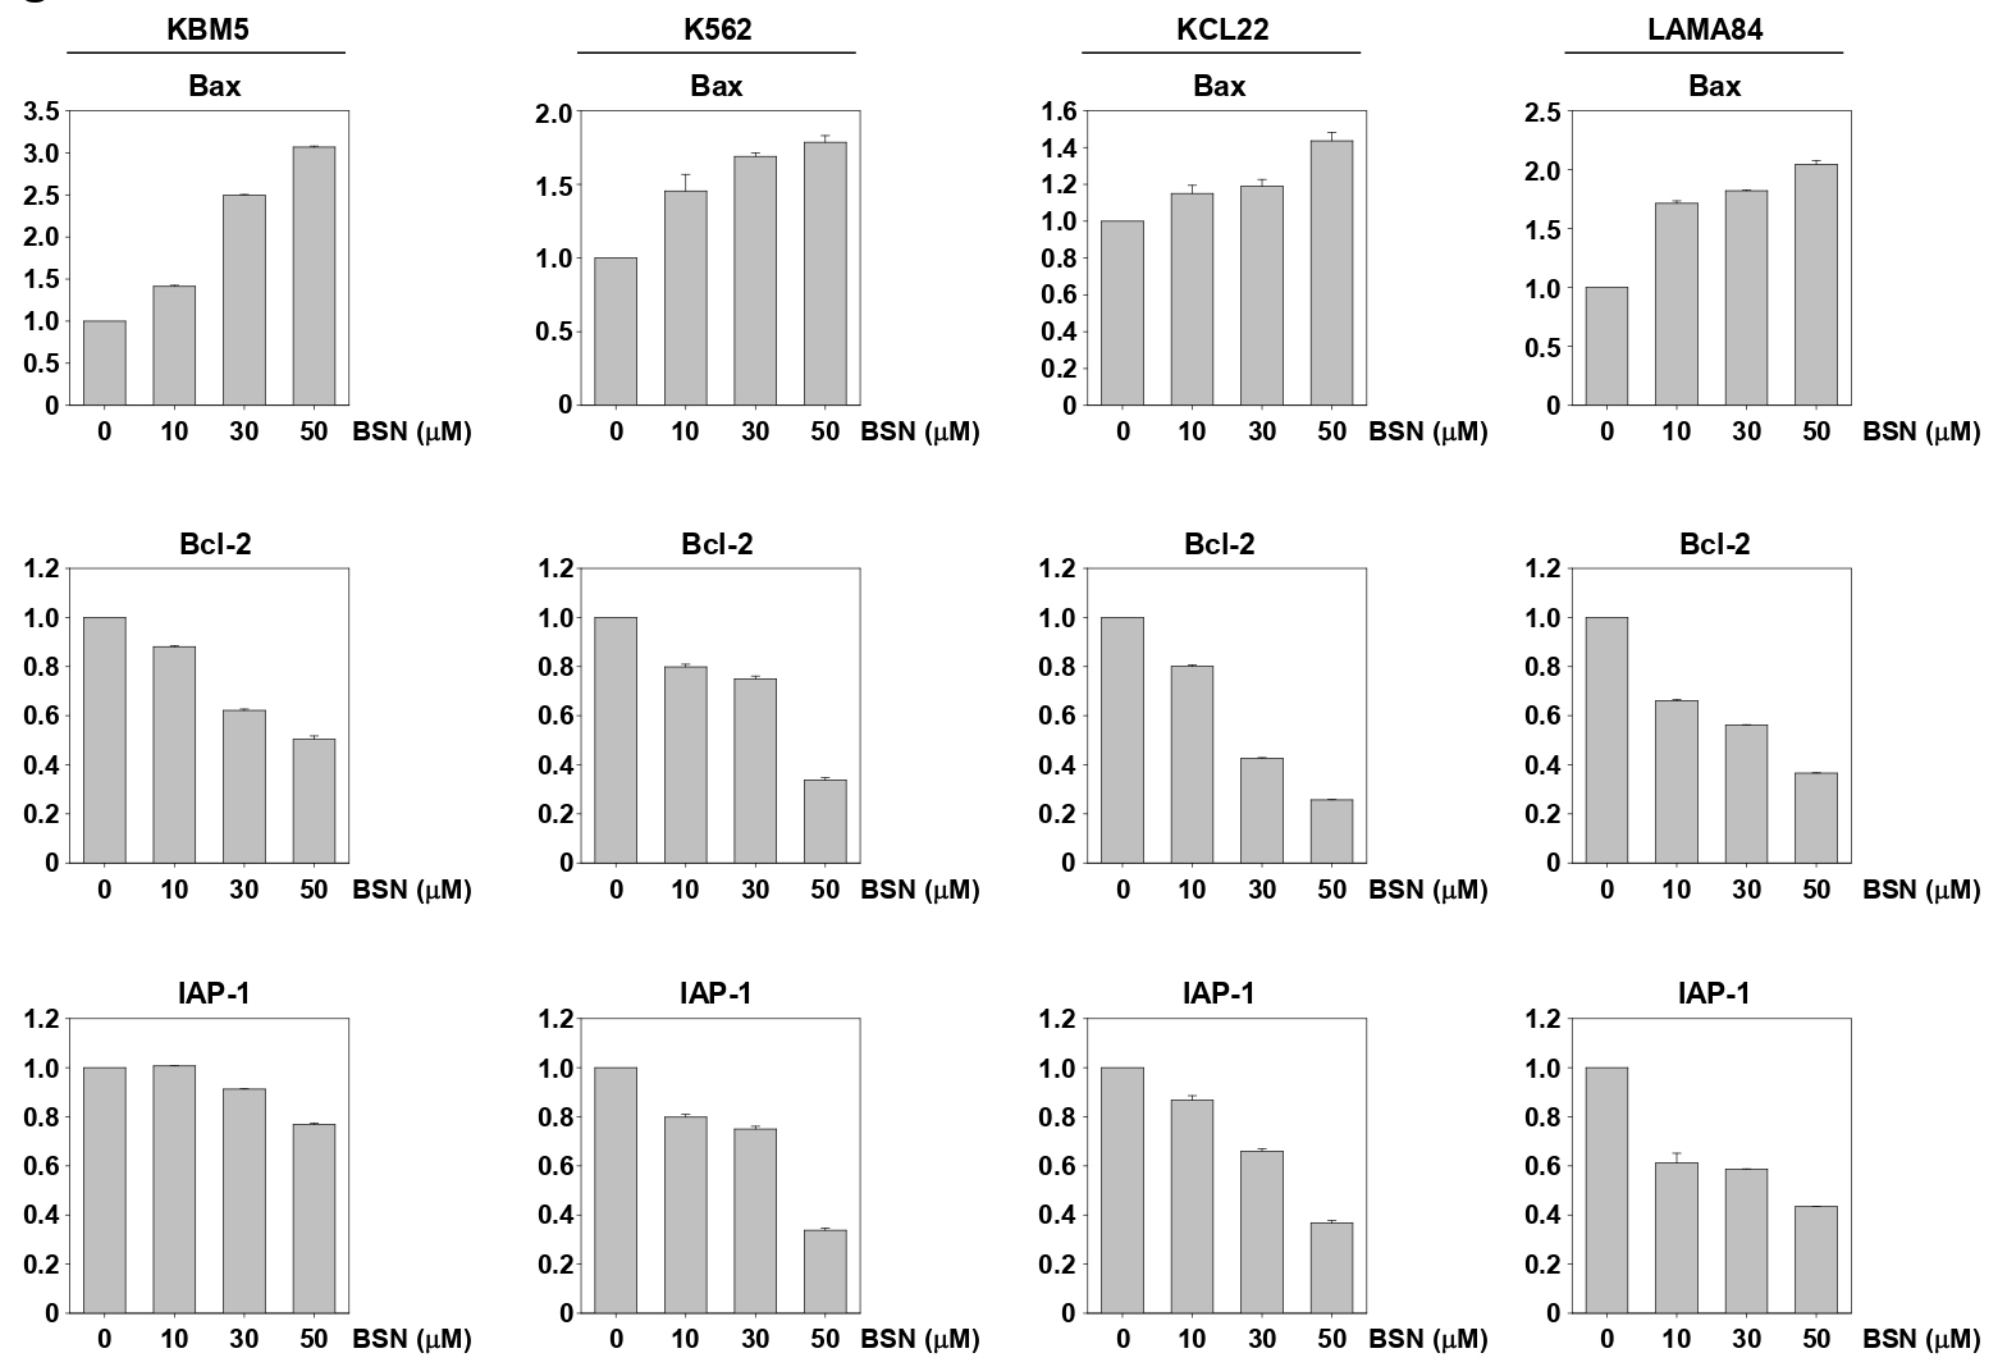

**Fig.S4**

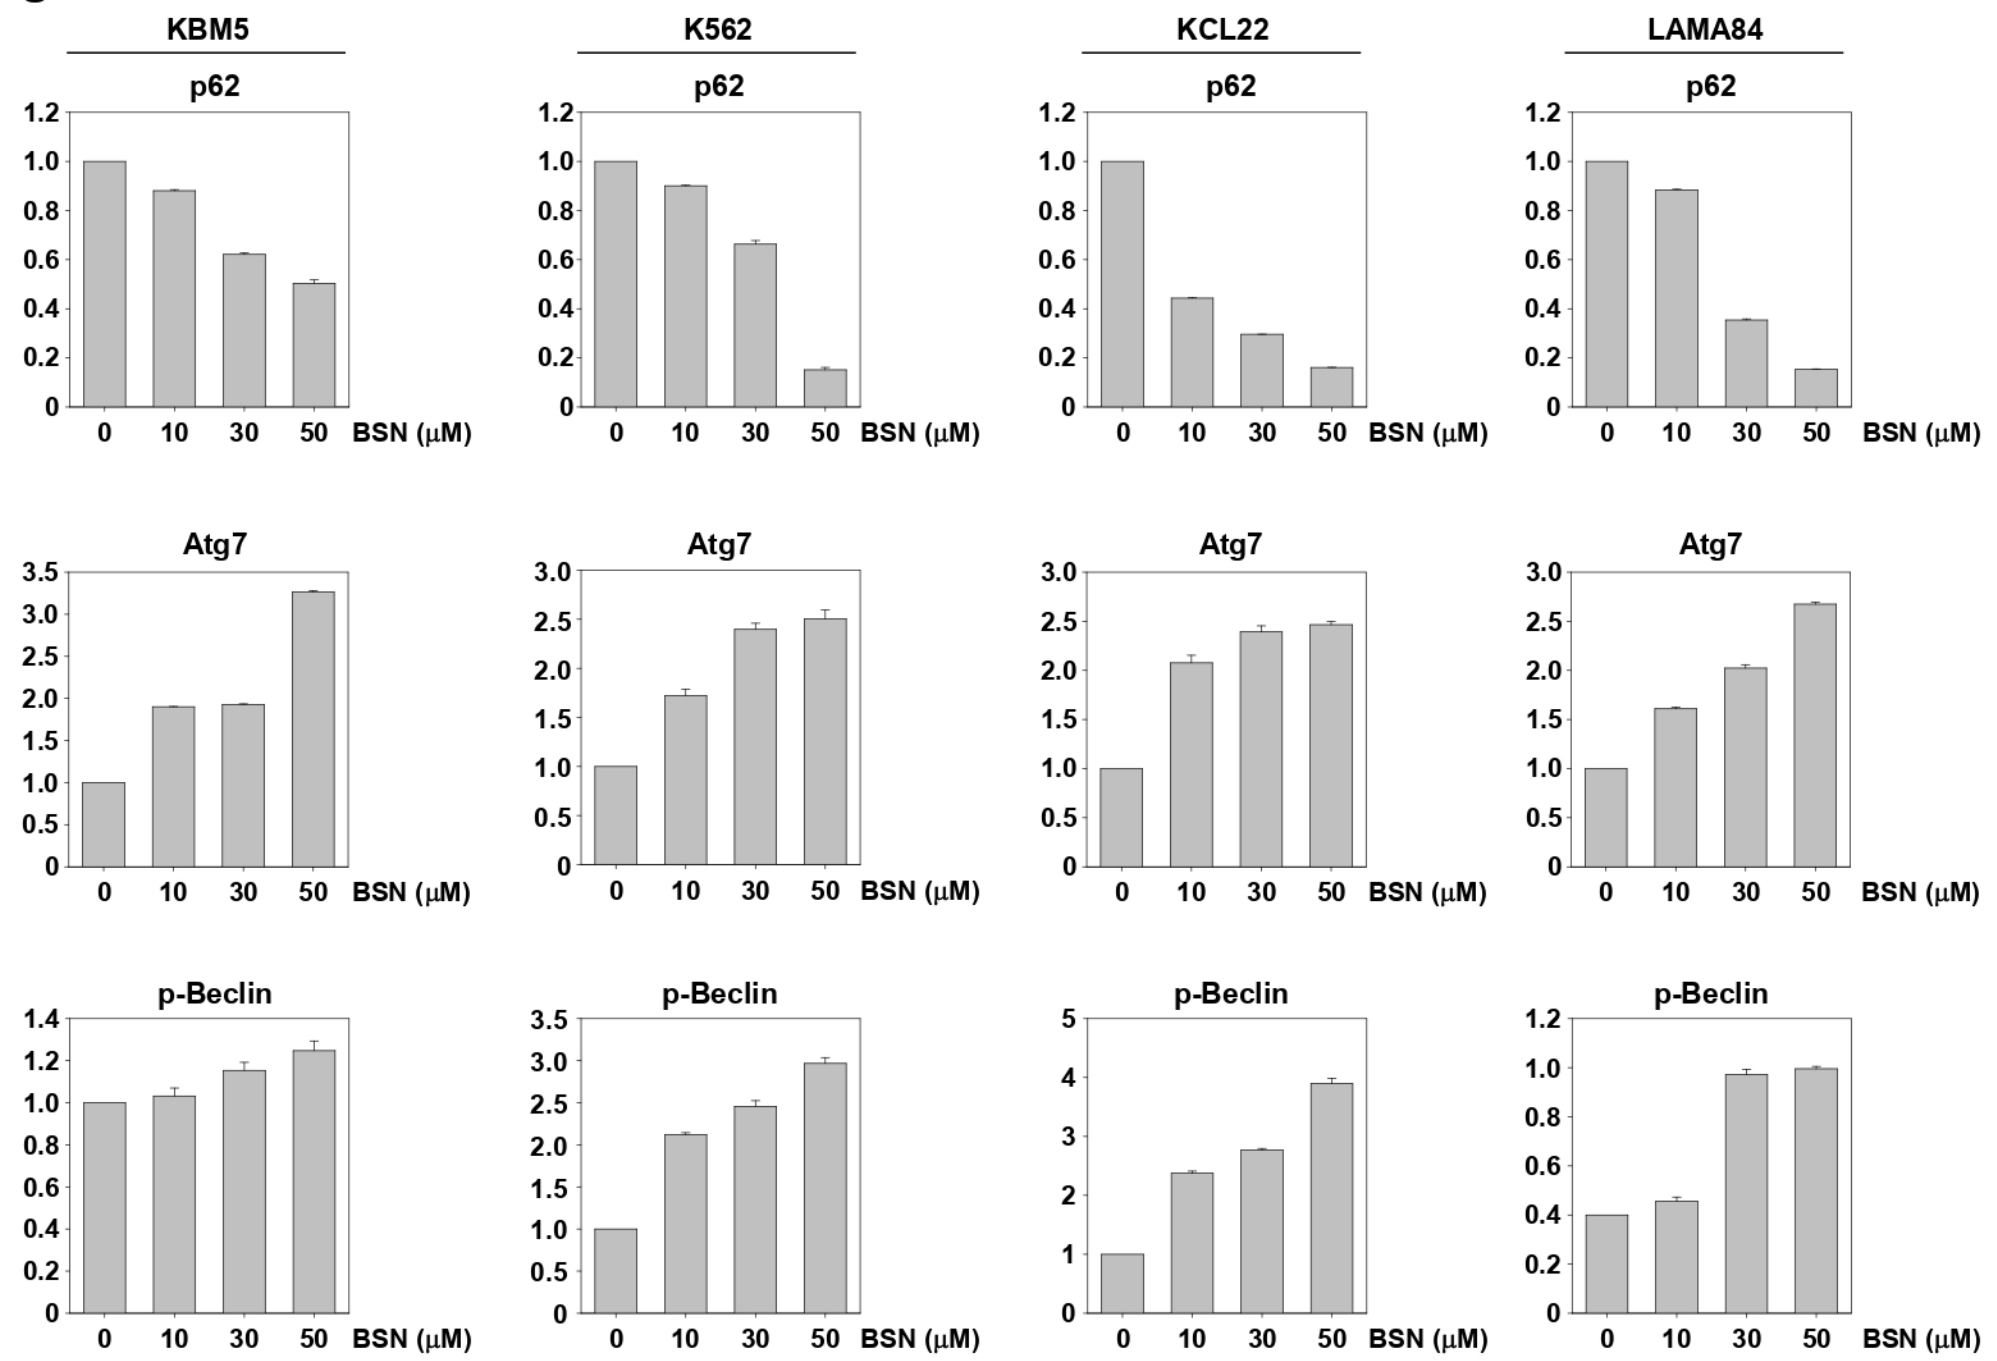

**Fig.S5**

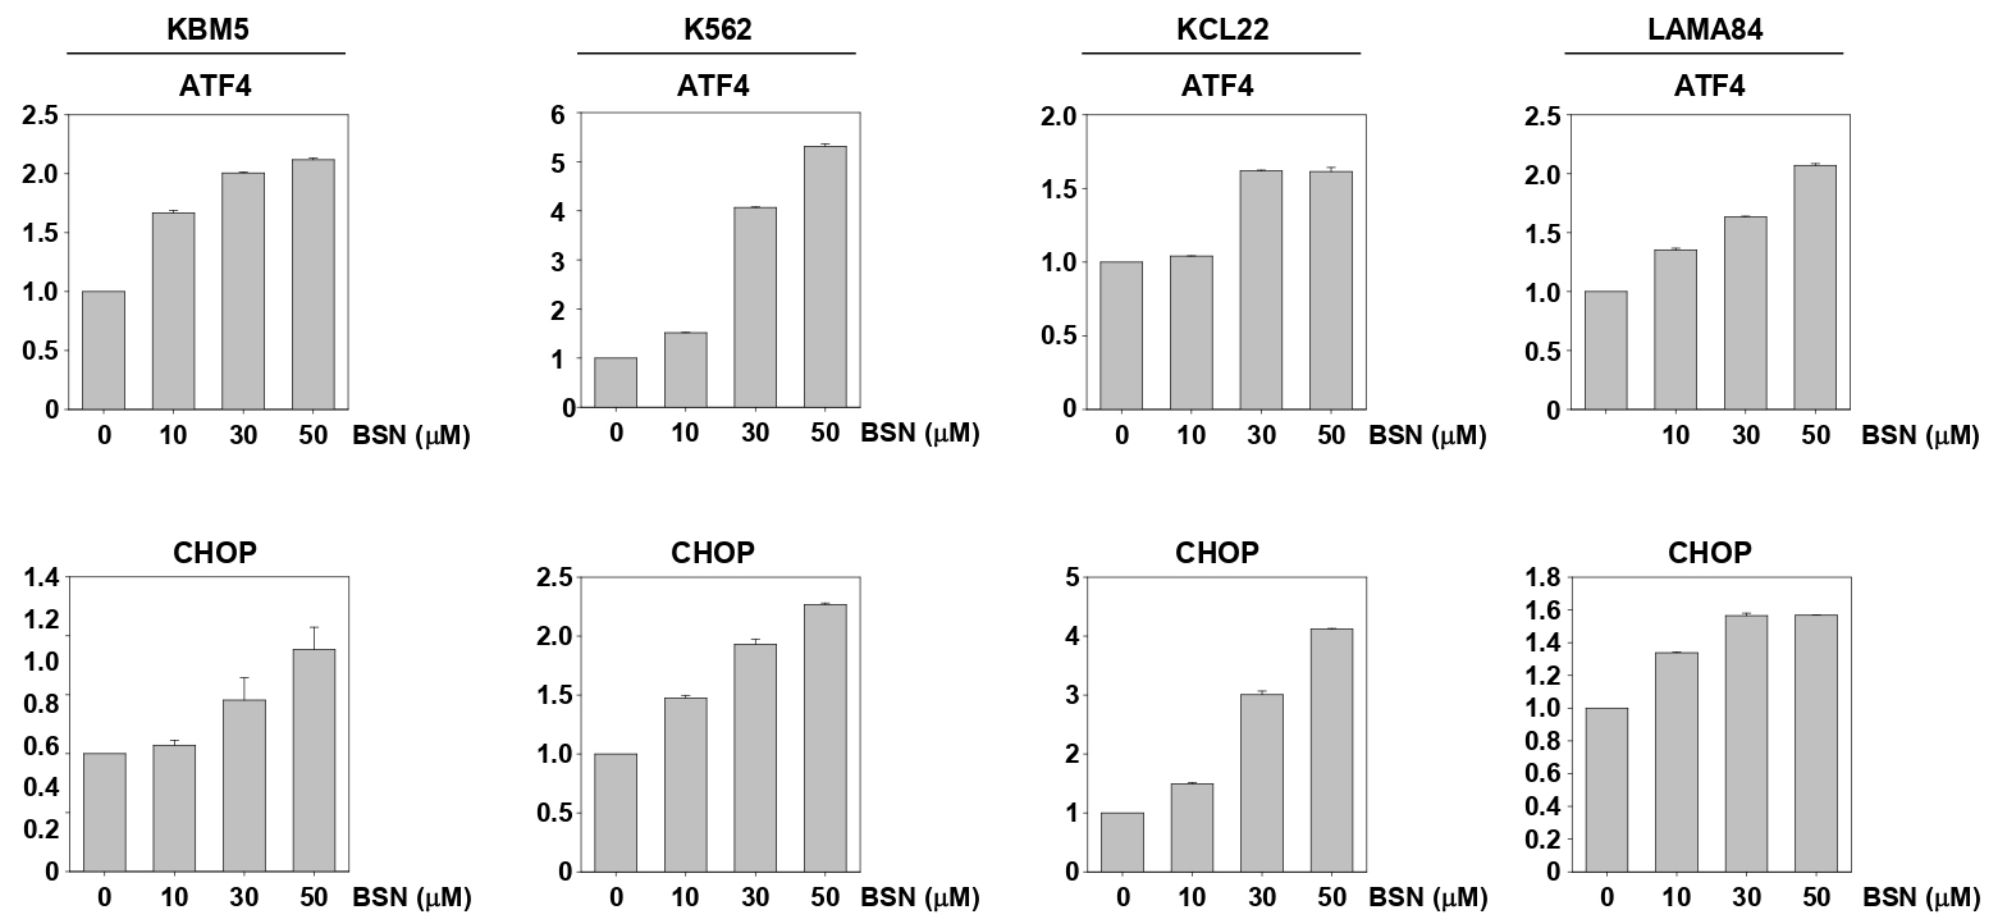

**Fig.S6**

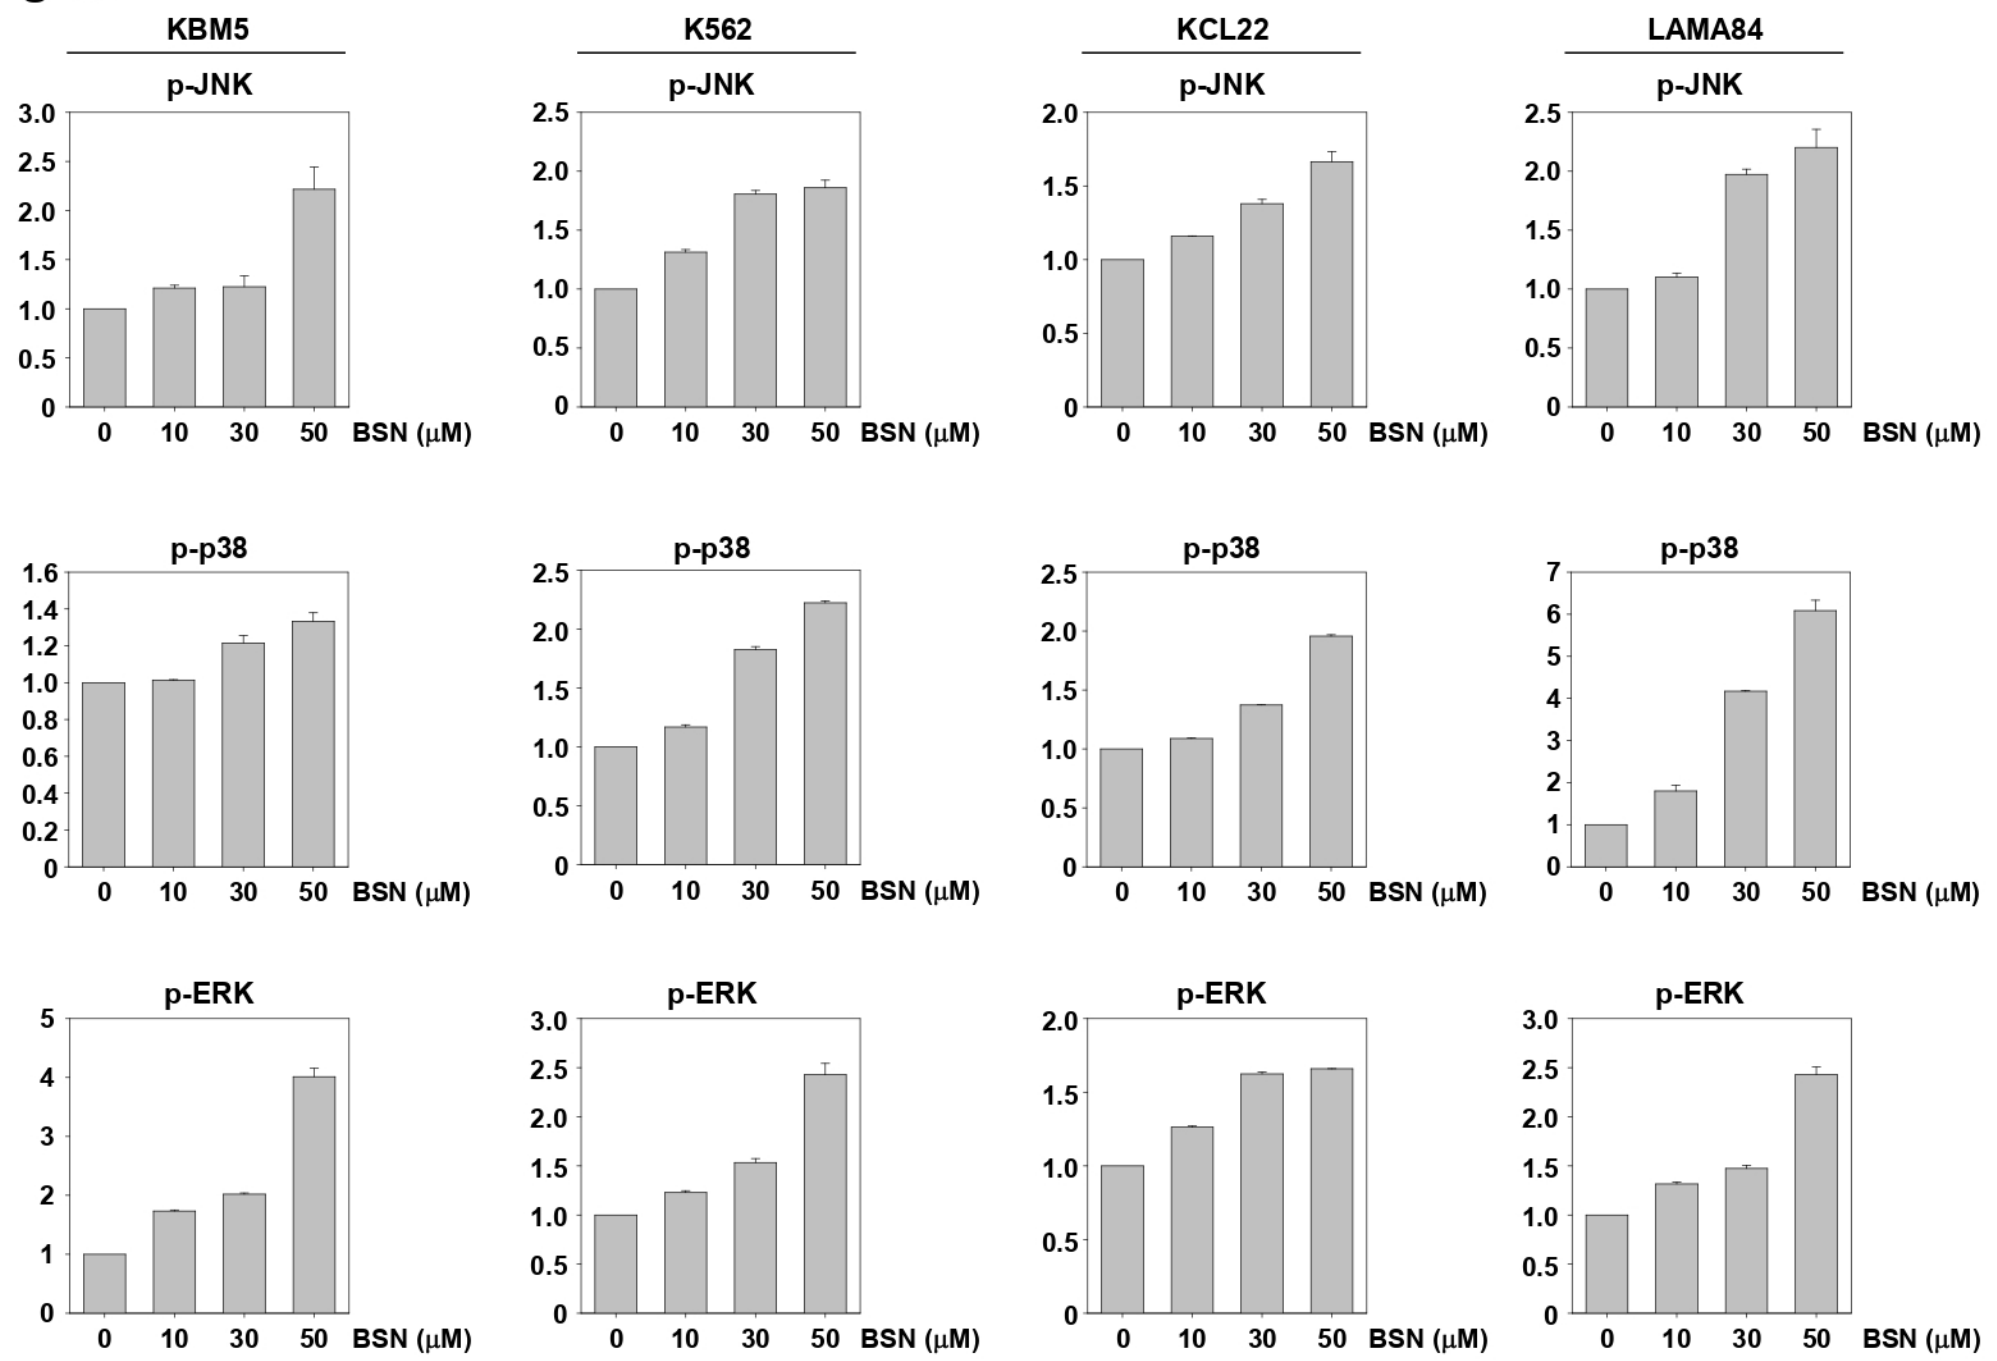

Fig.S7

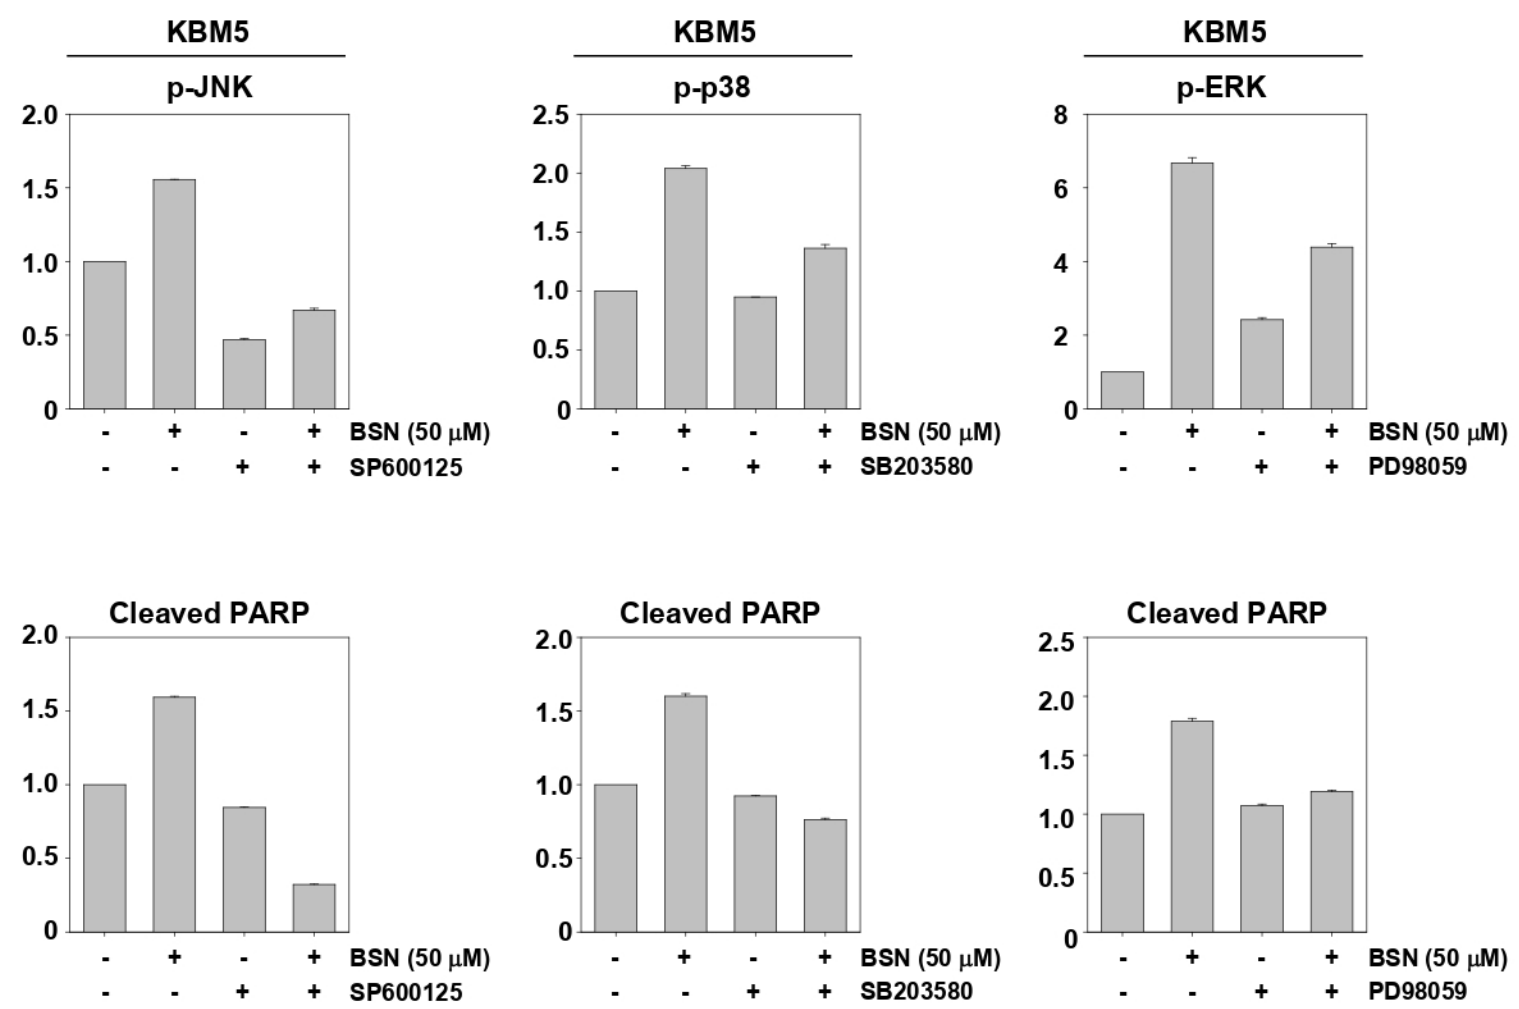

Fig. S8

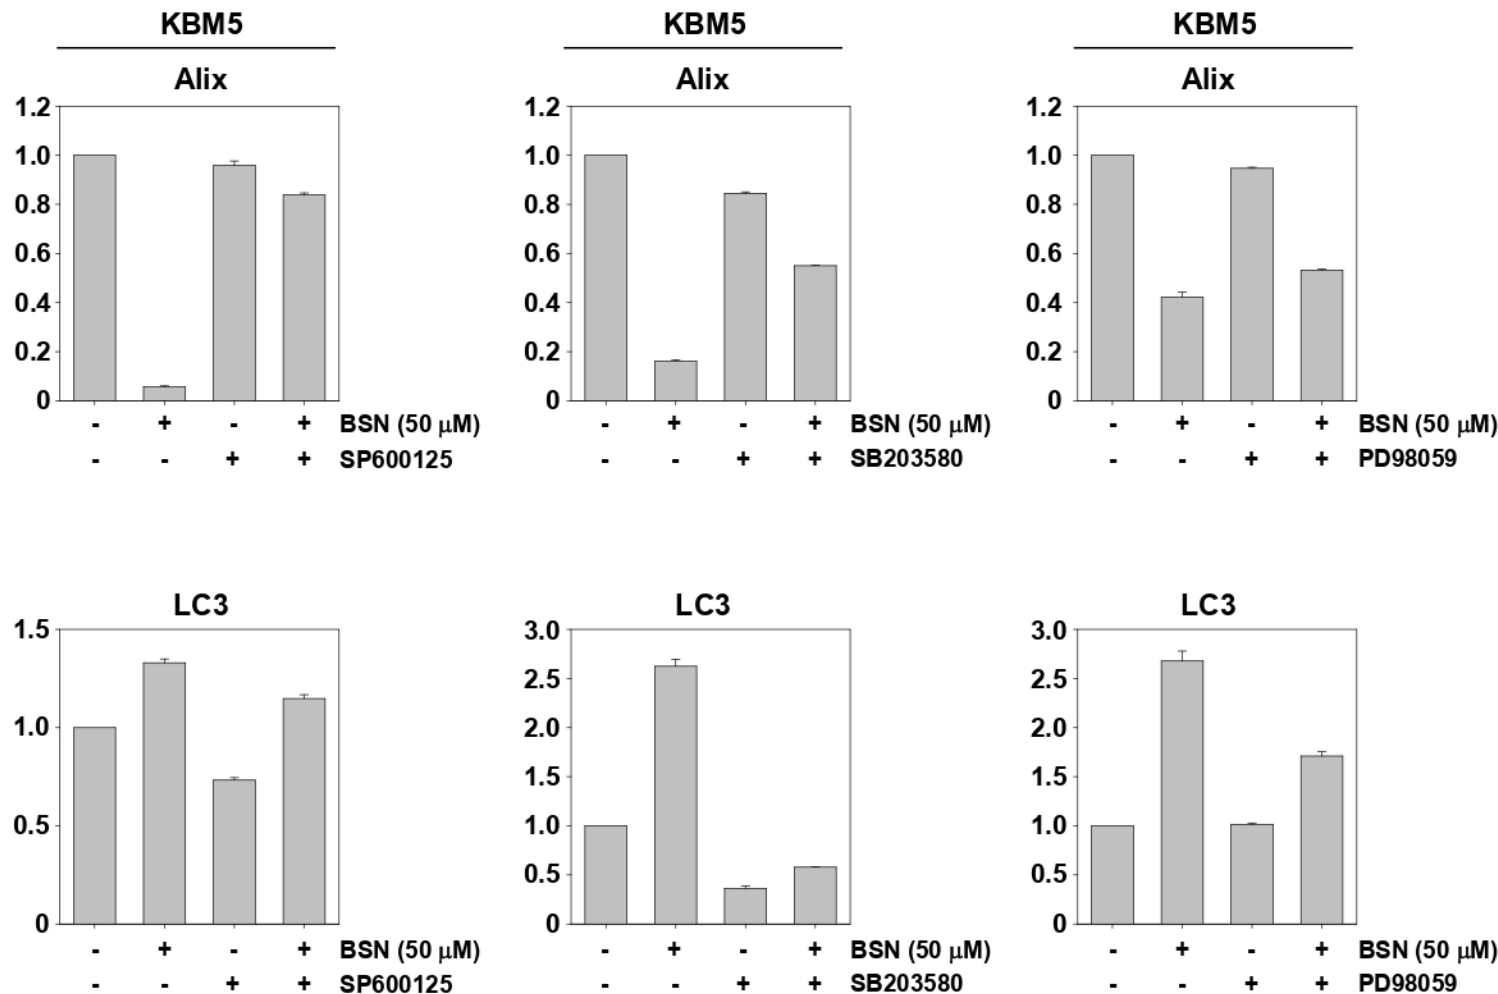

Fig.S9

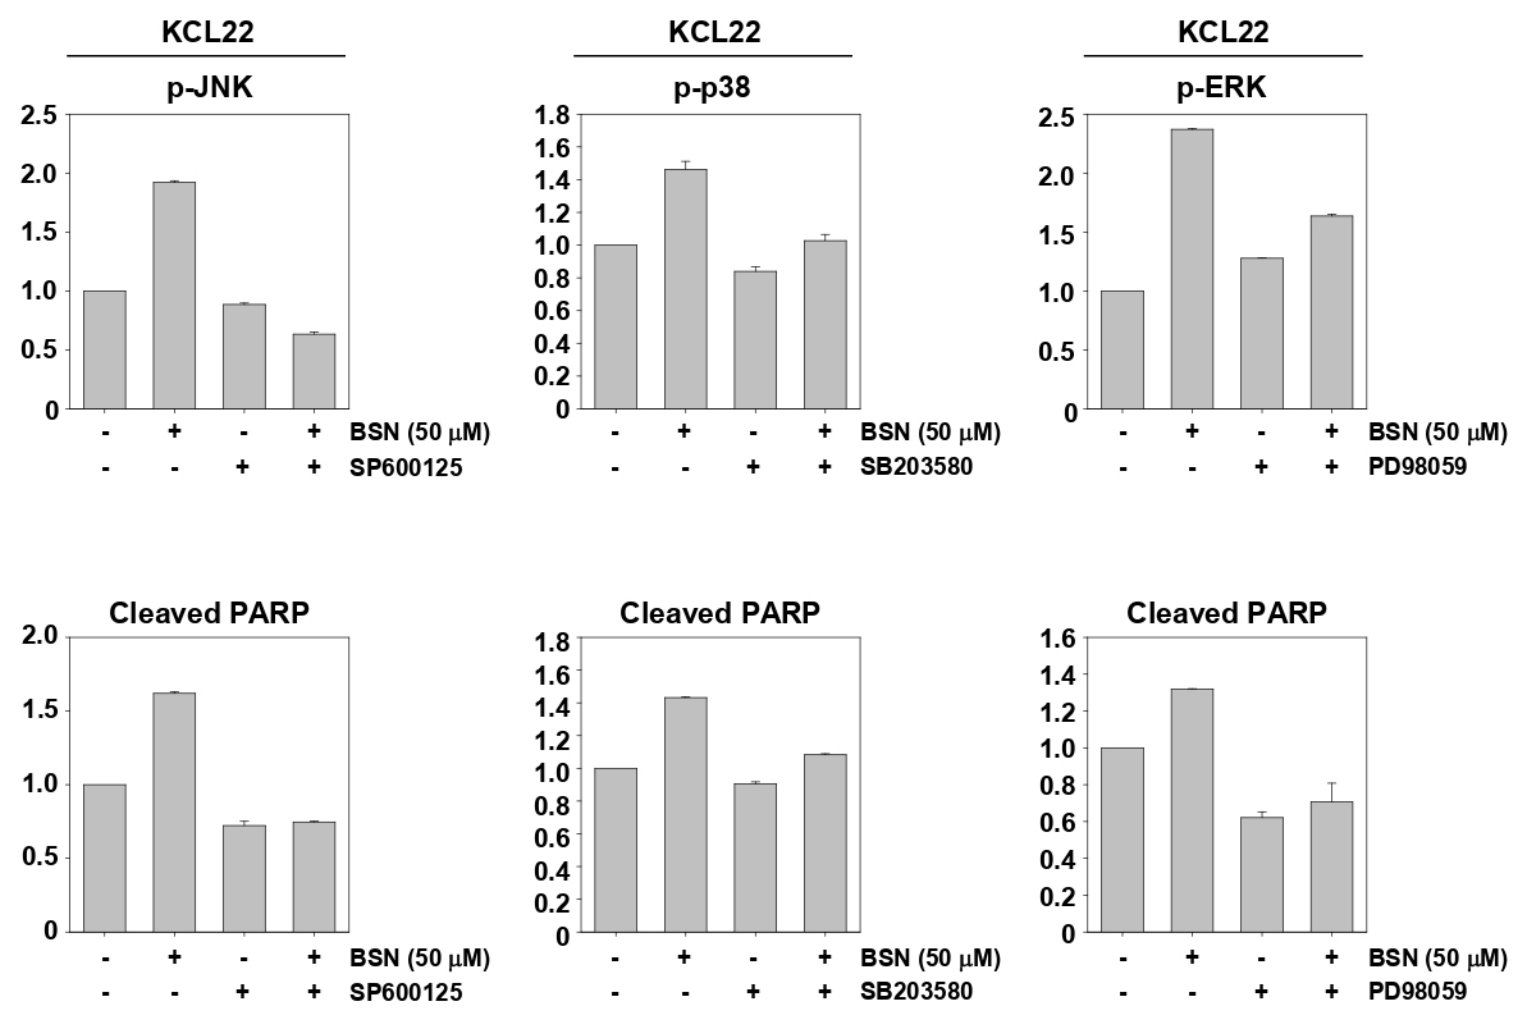

Fig.S10

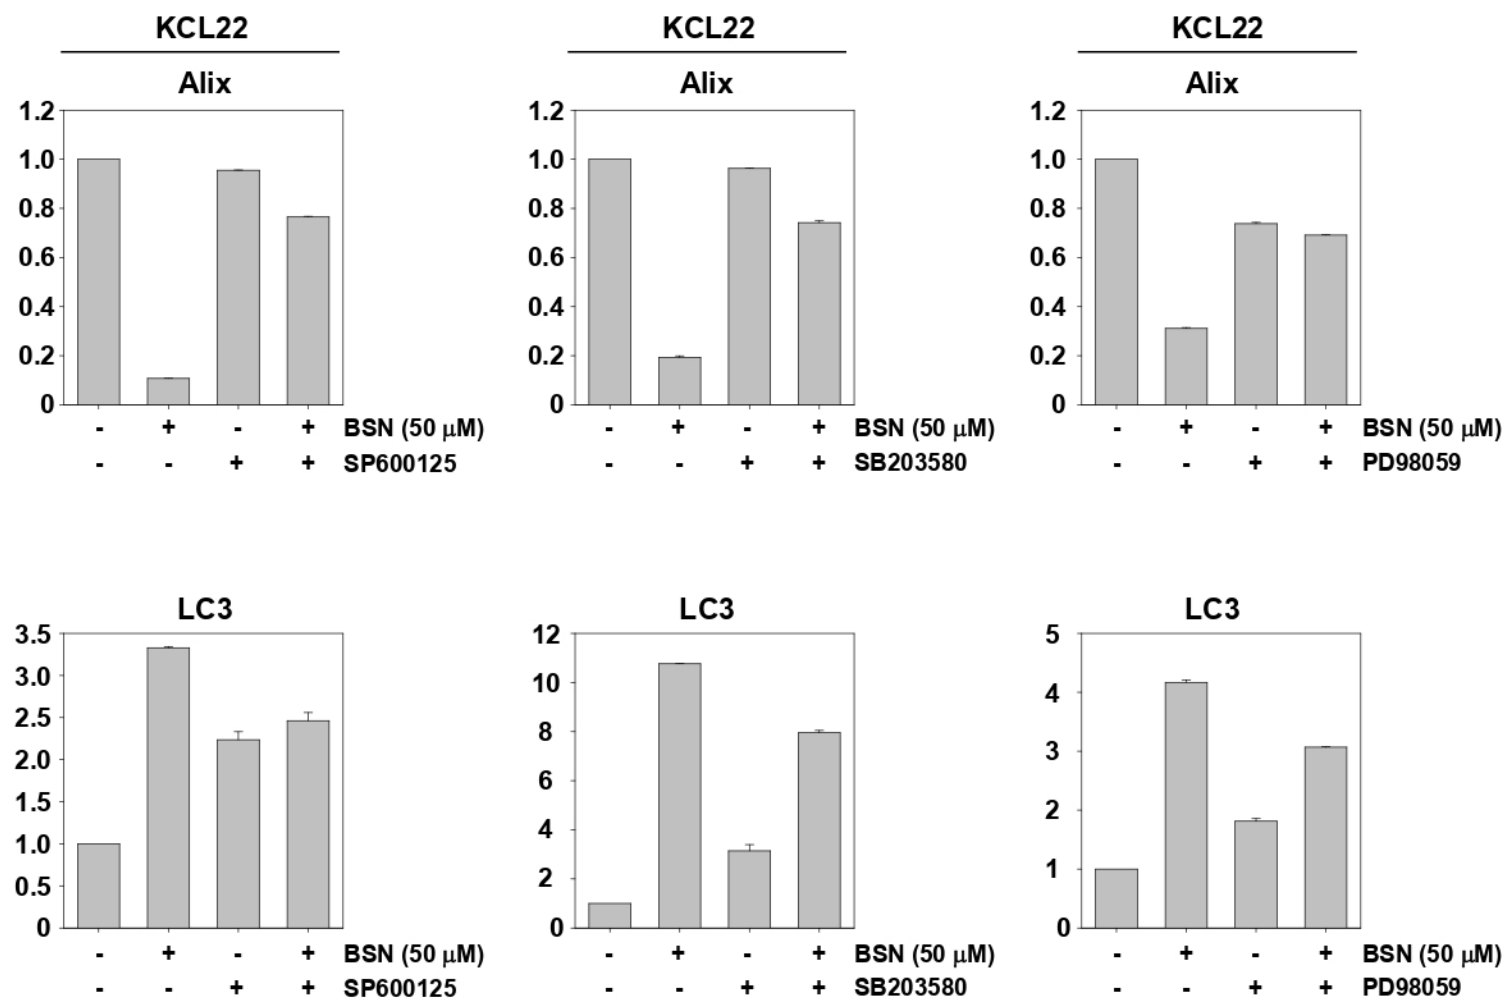

Fig. S11

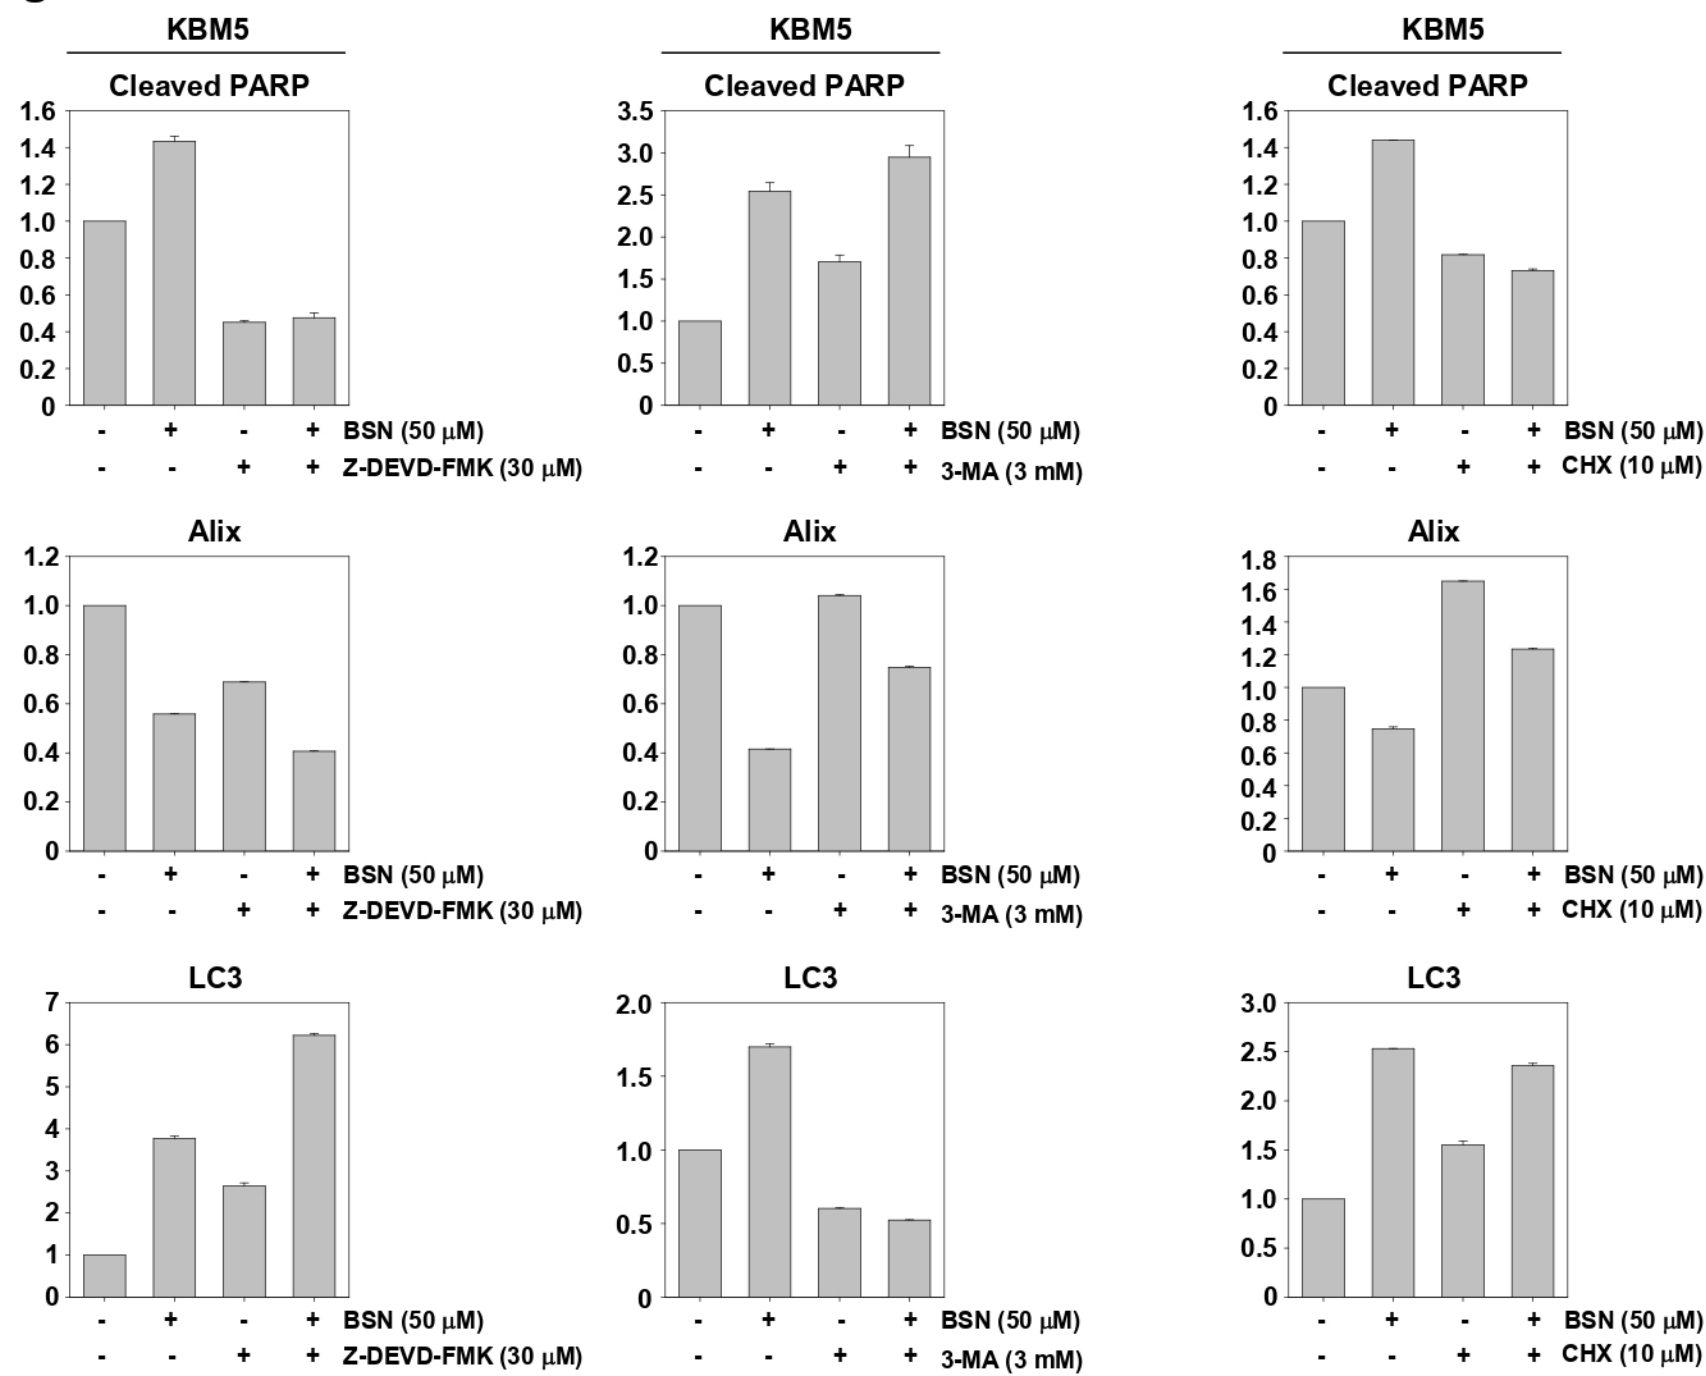

**Fig.S12**

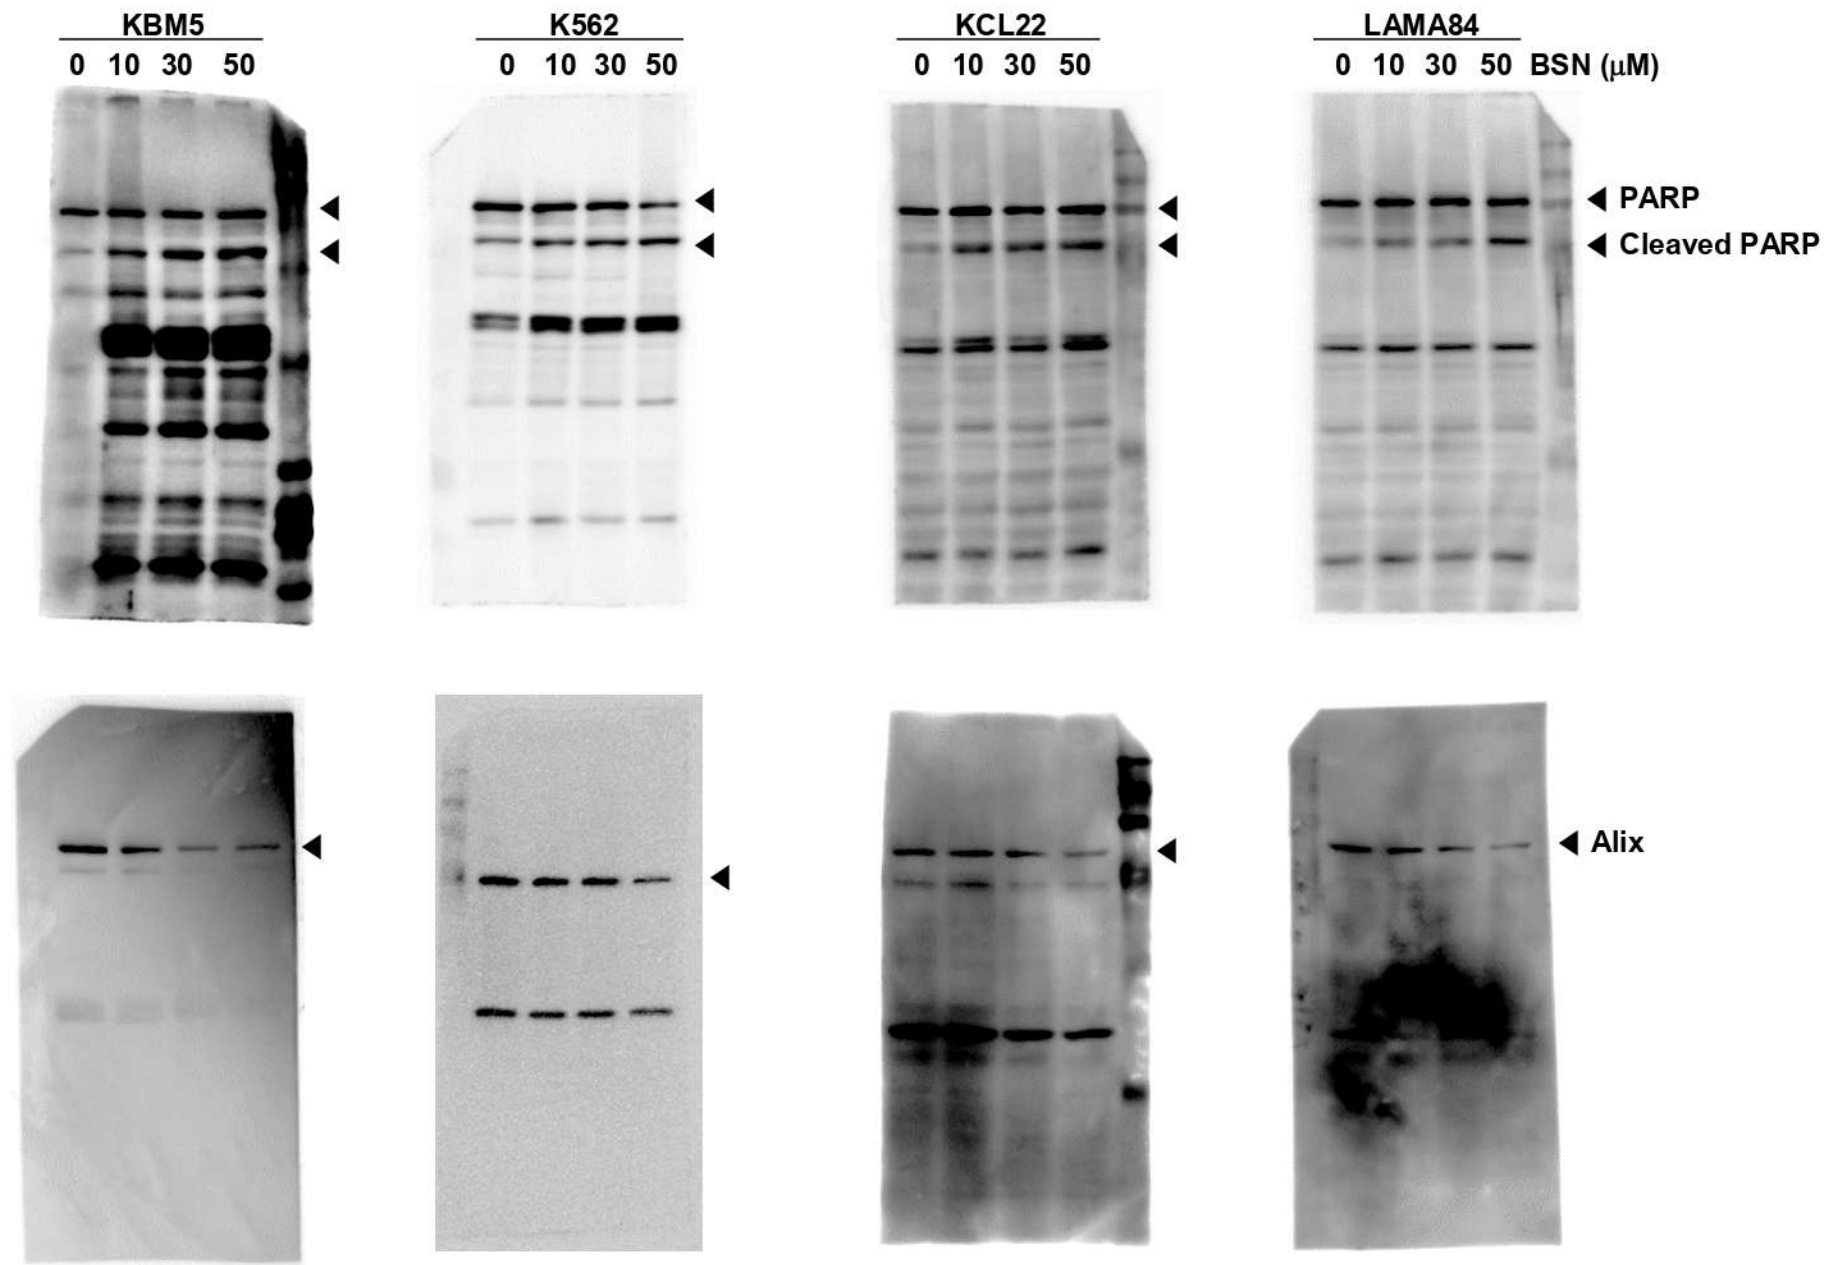

**Fig. S13**

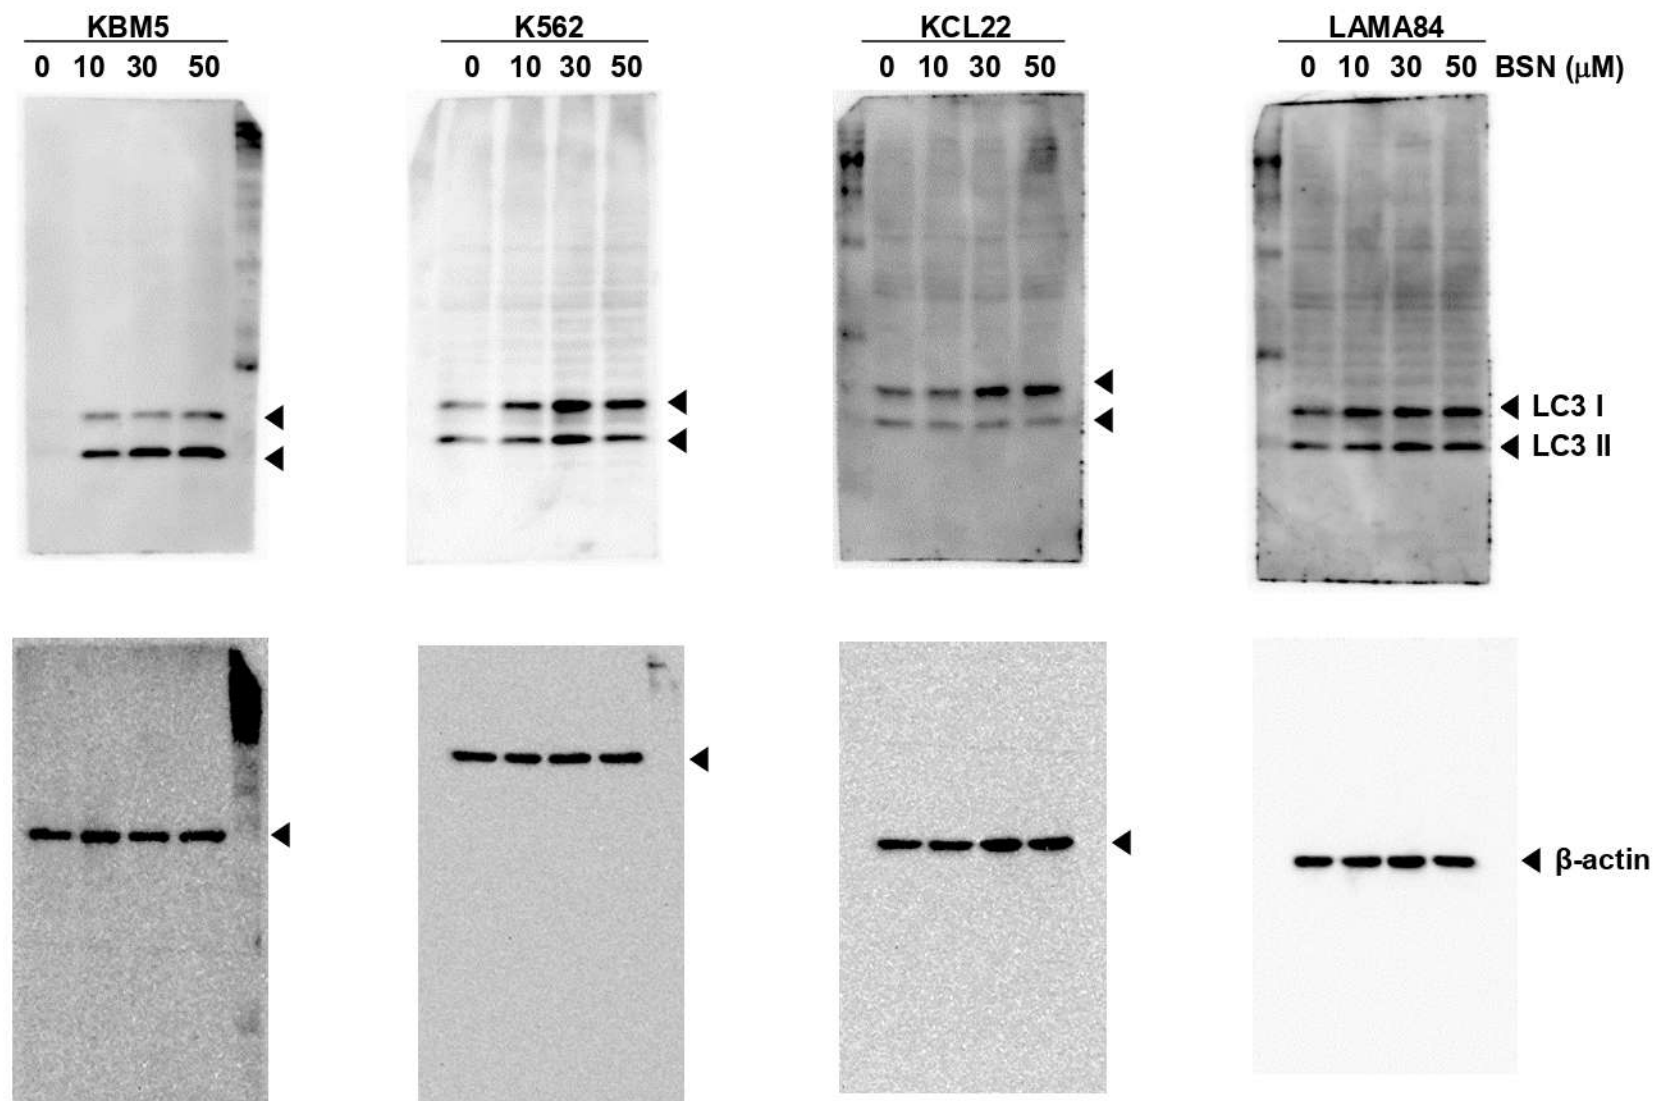

**Fig.S14**

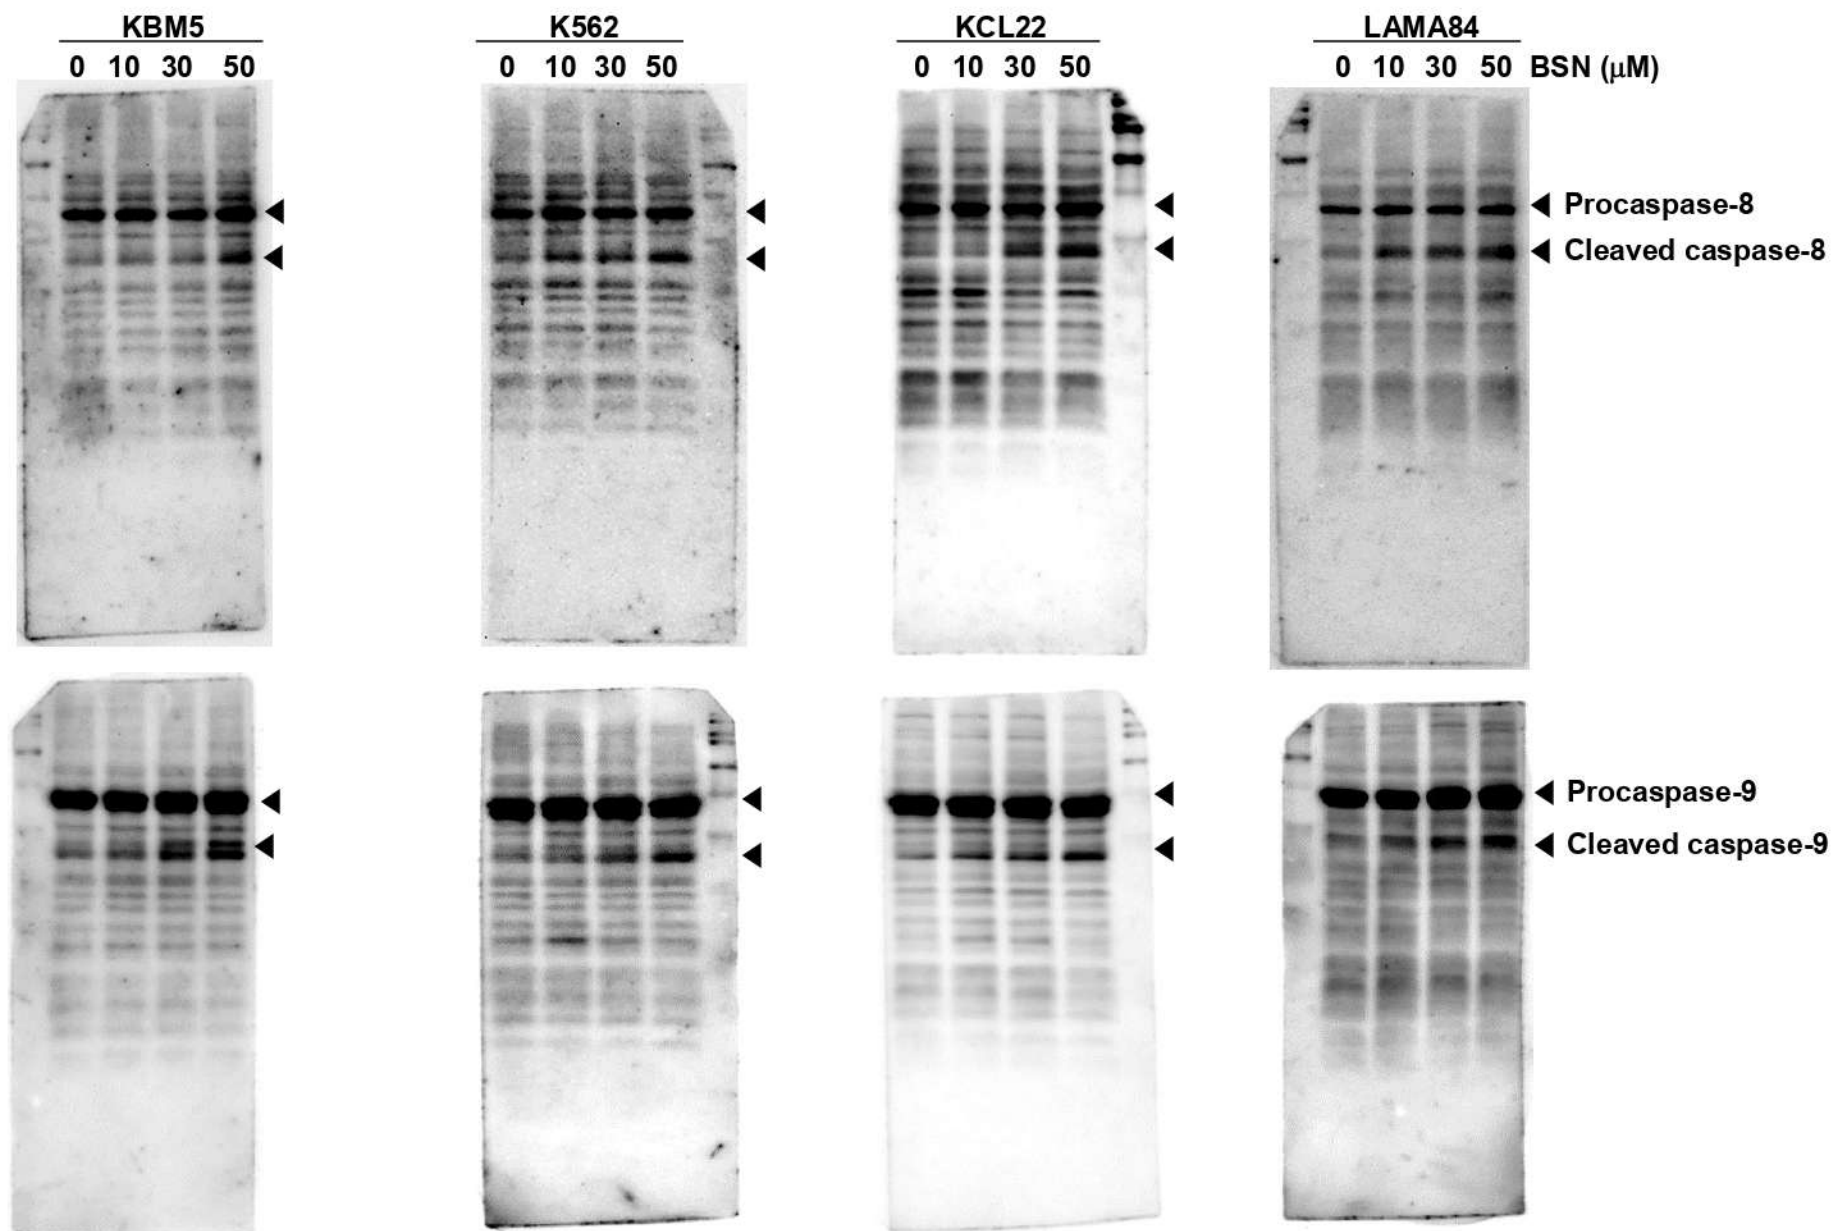

**Fig.S15**

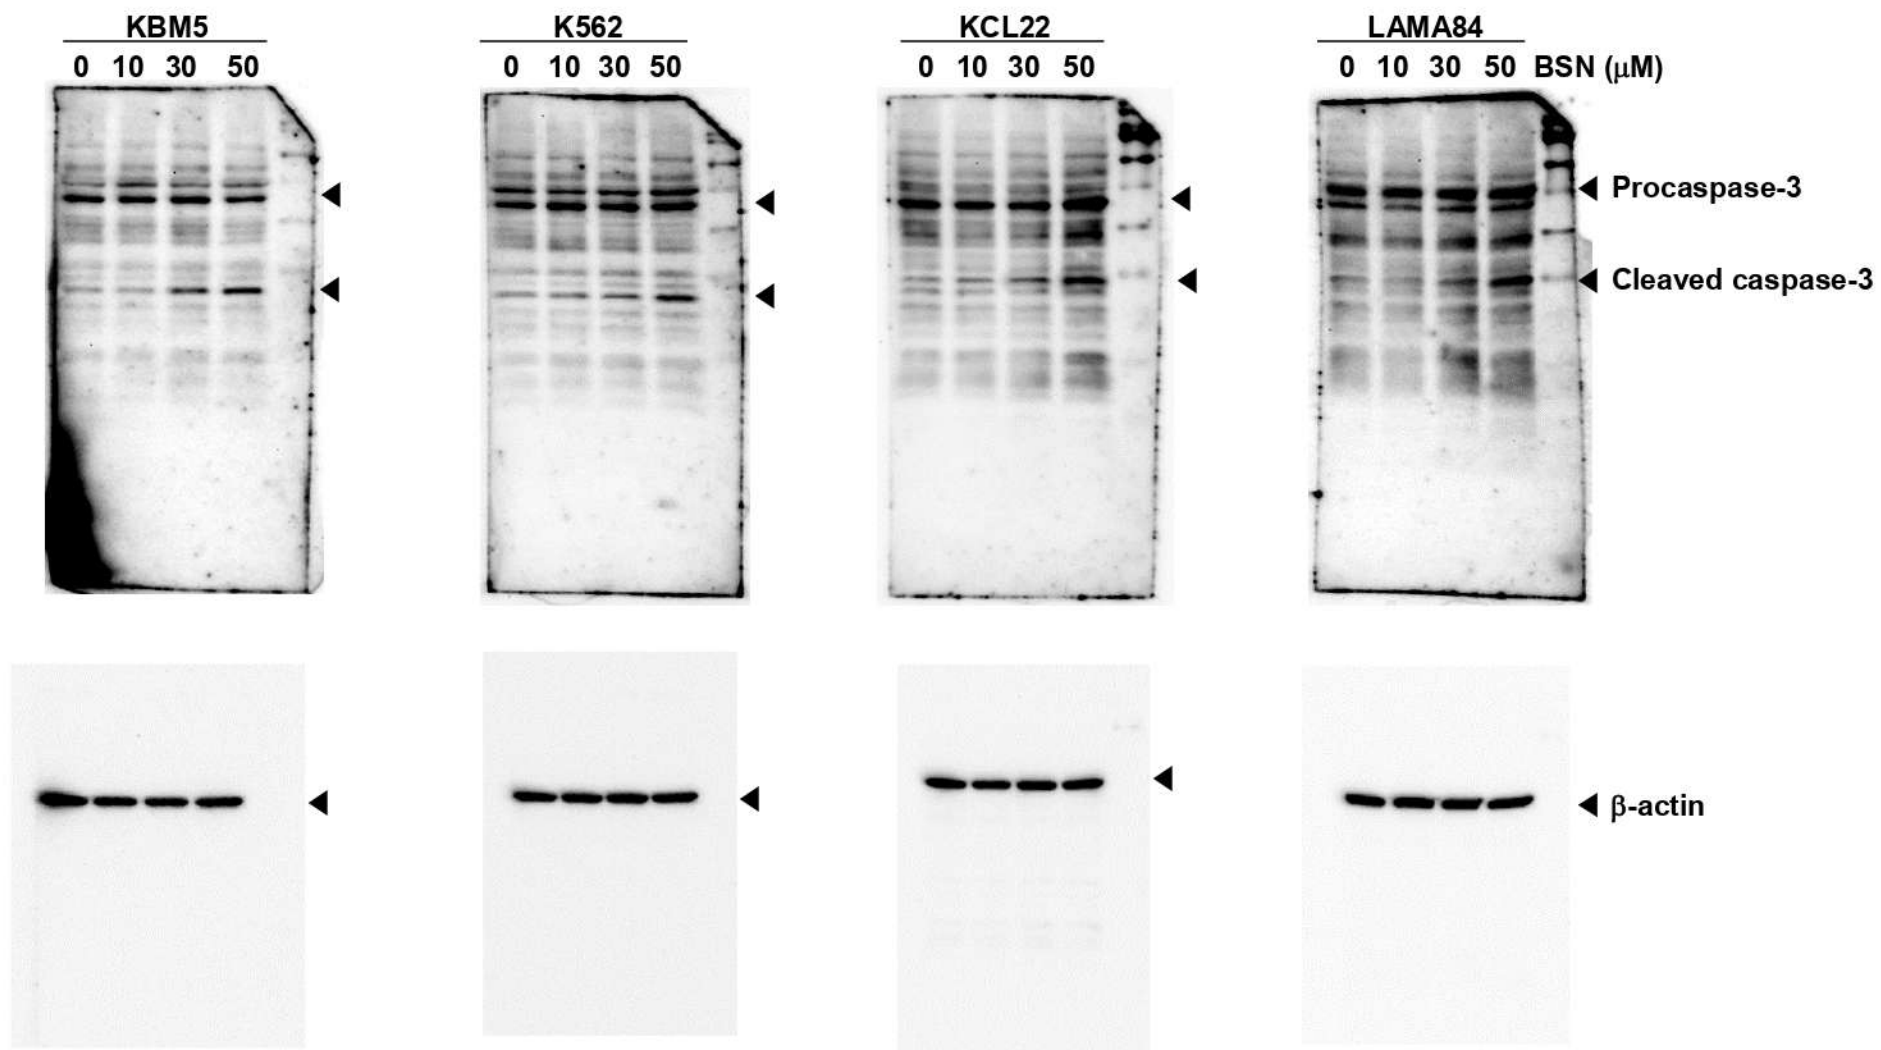

**Fig.S16**

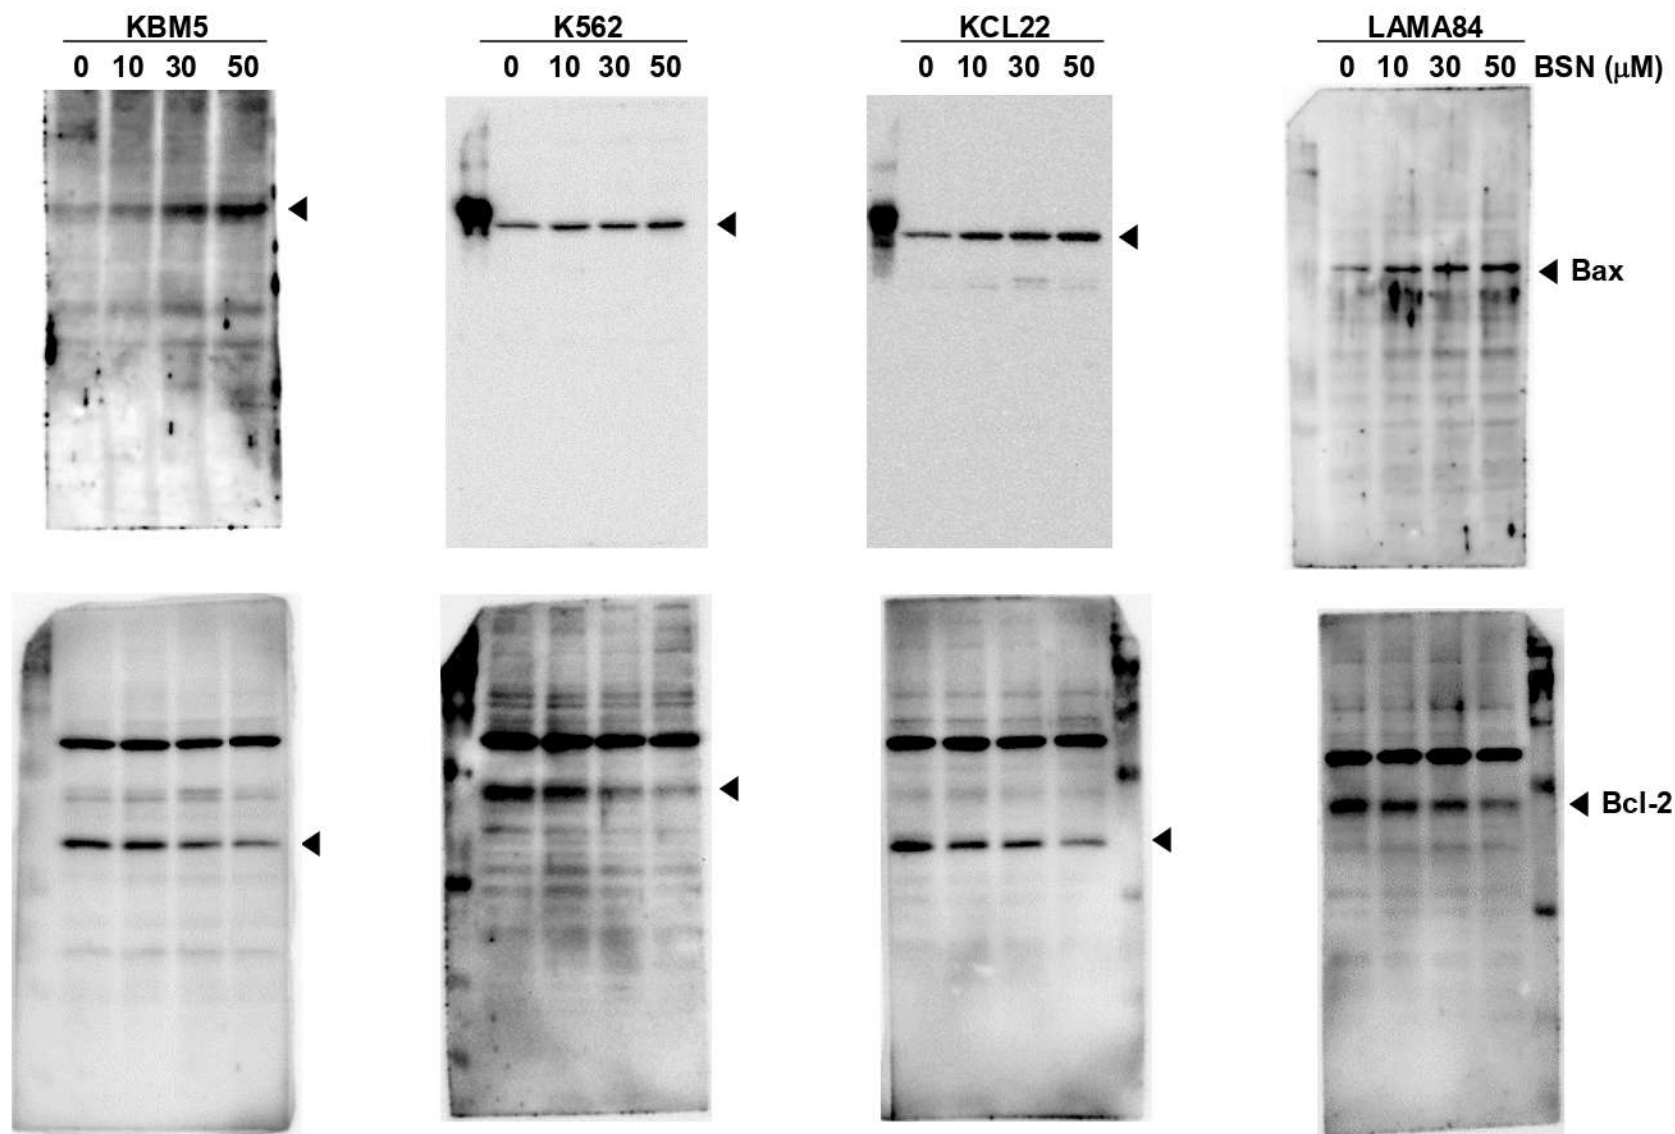

**Fig.S17**

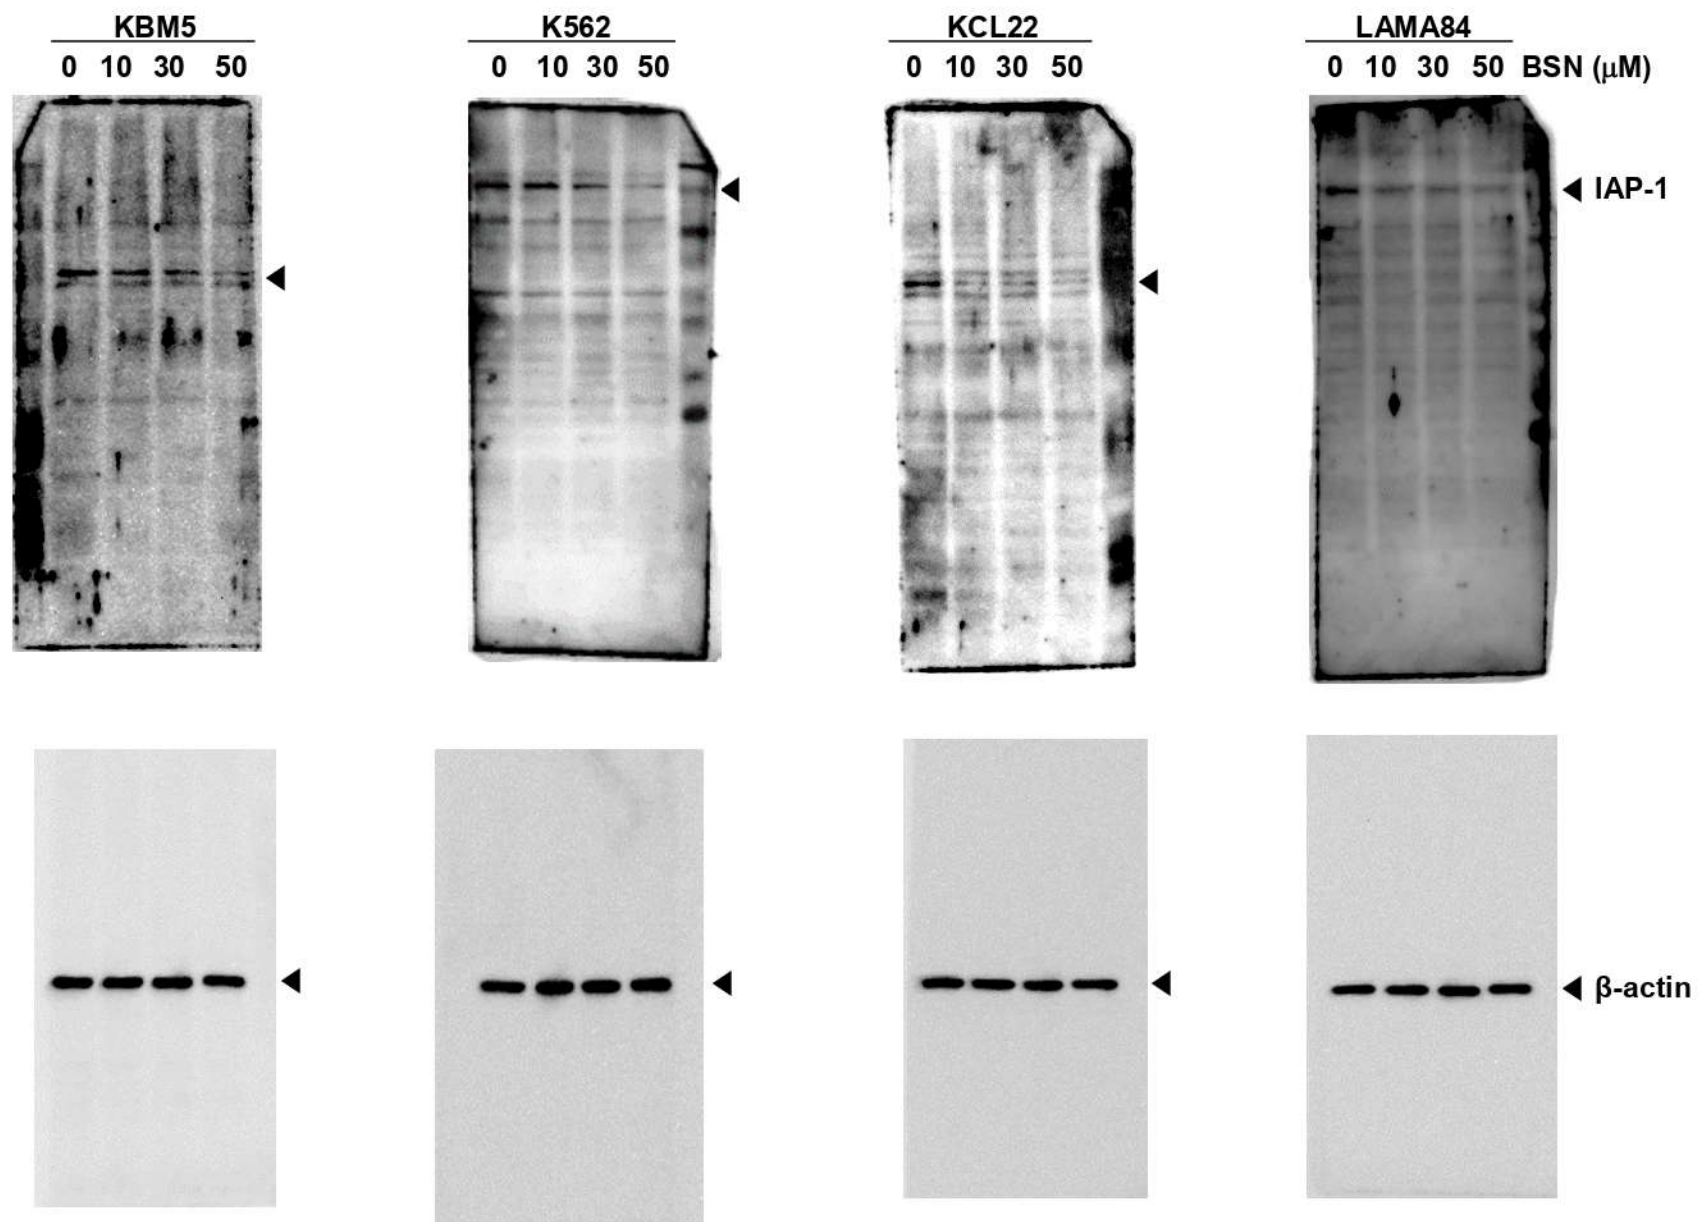

**Fig.S18**

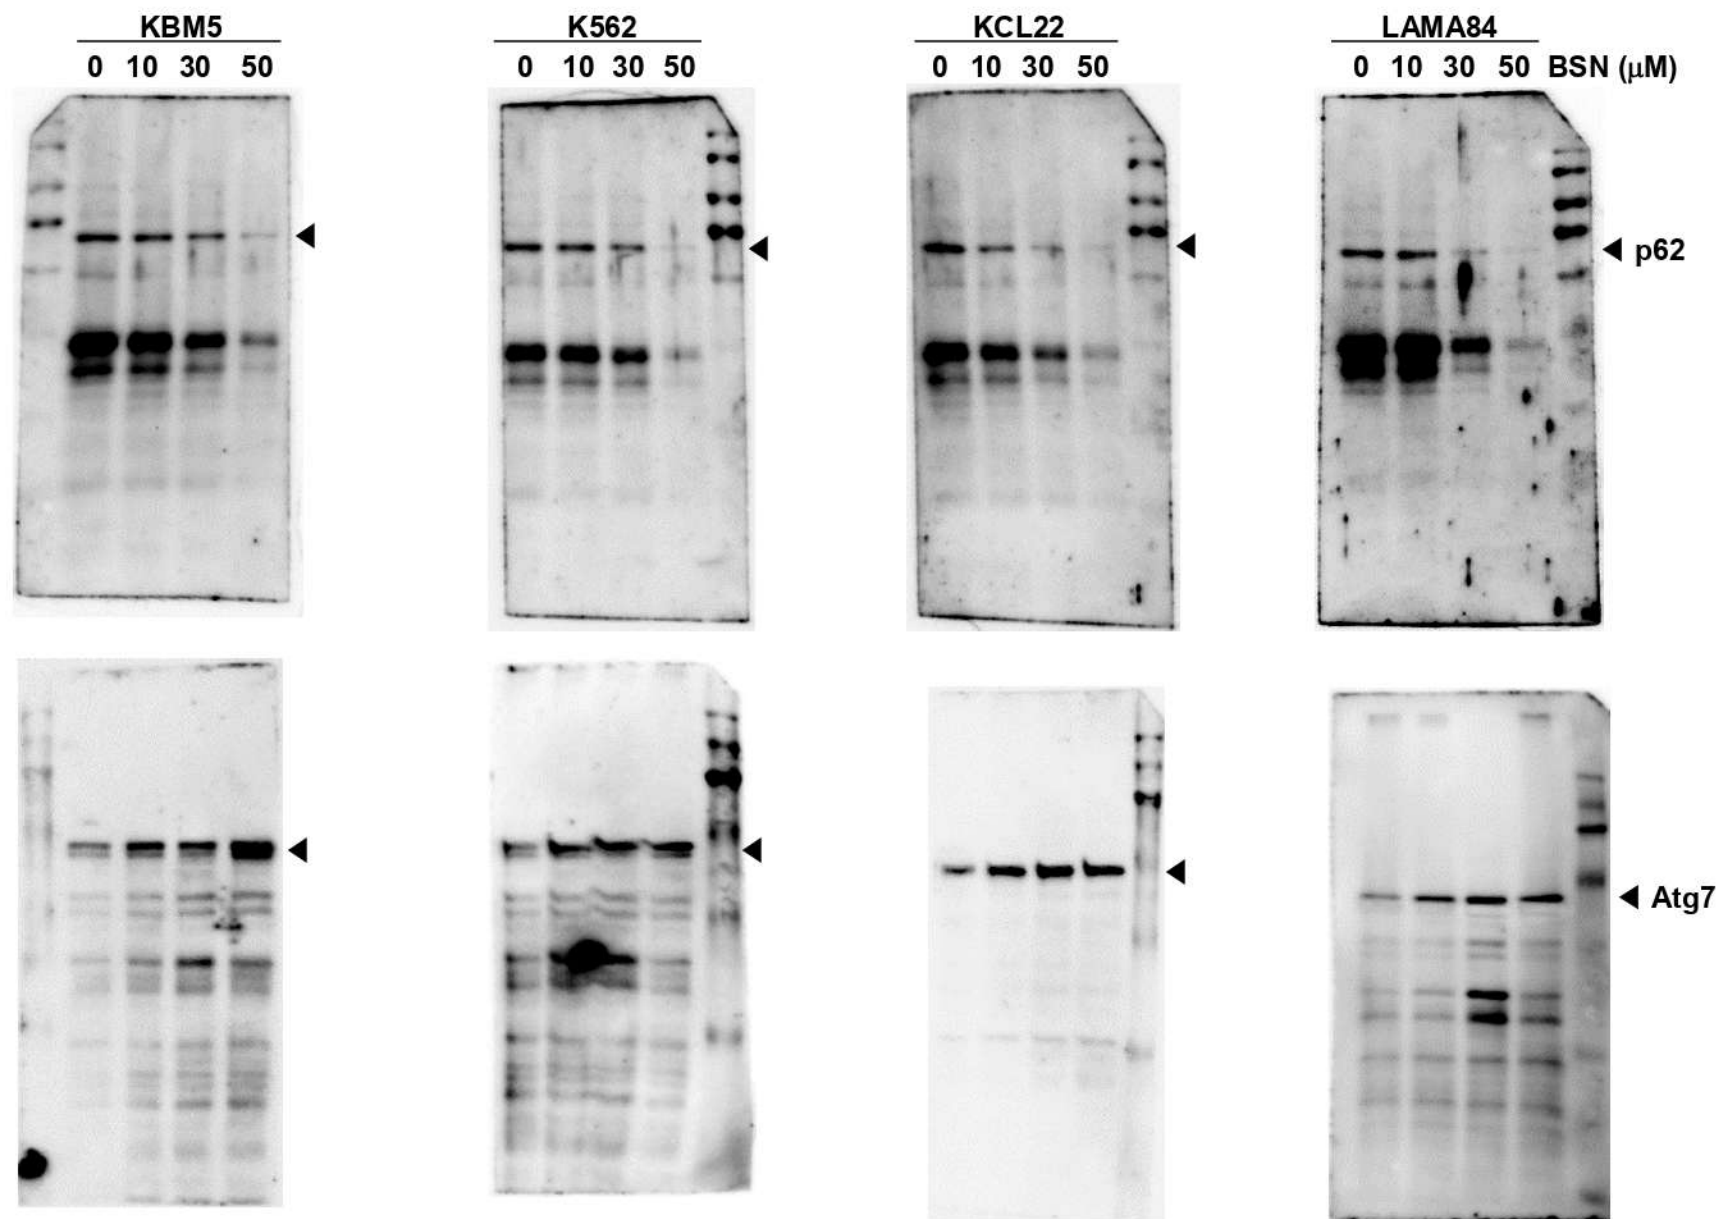

**Fig.S19**

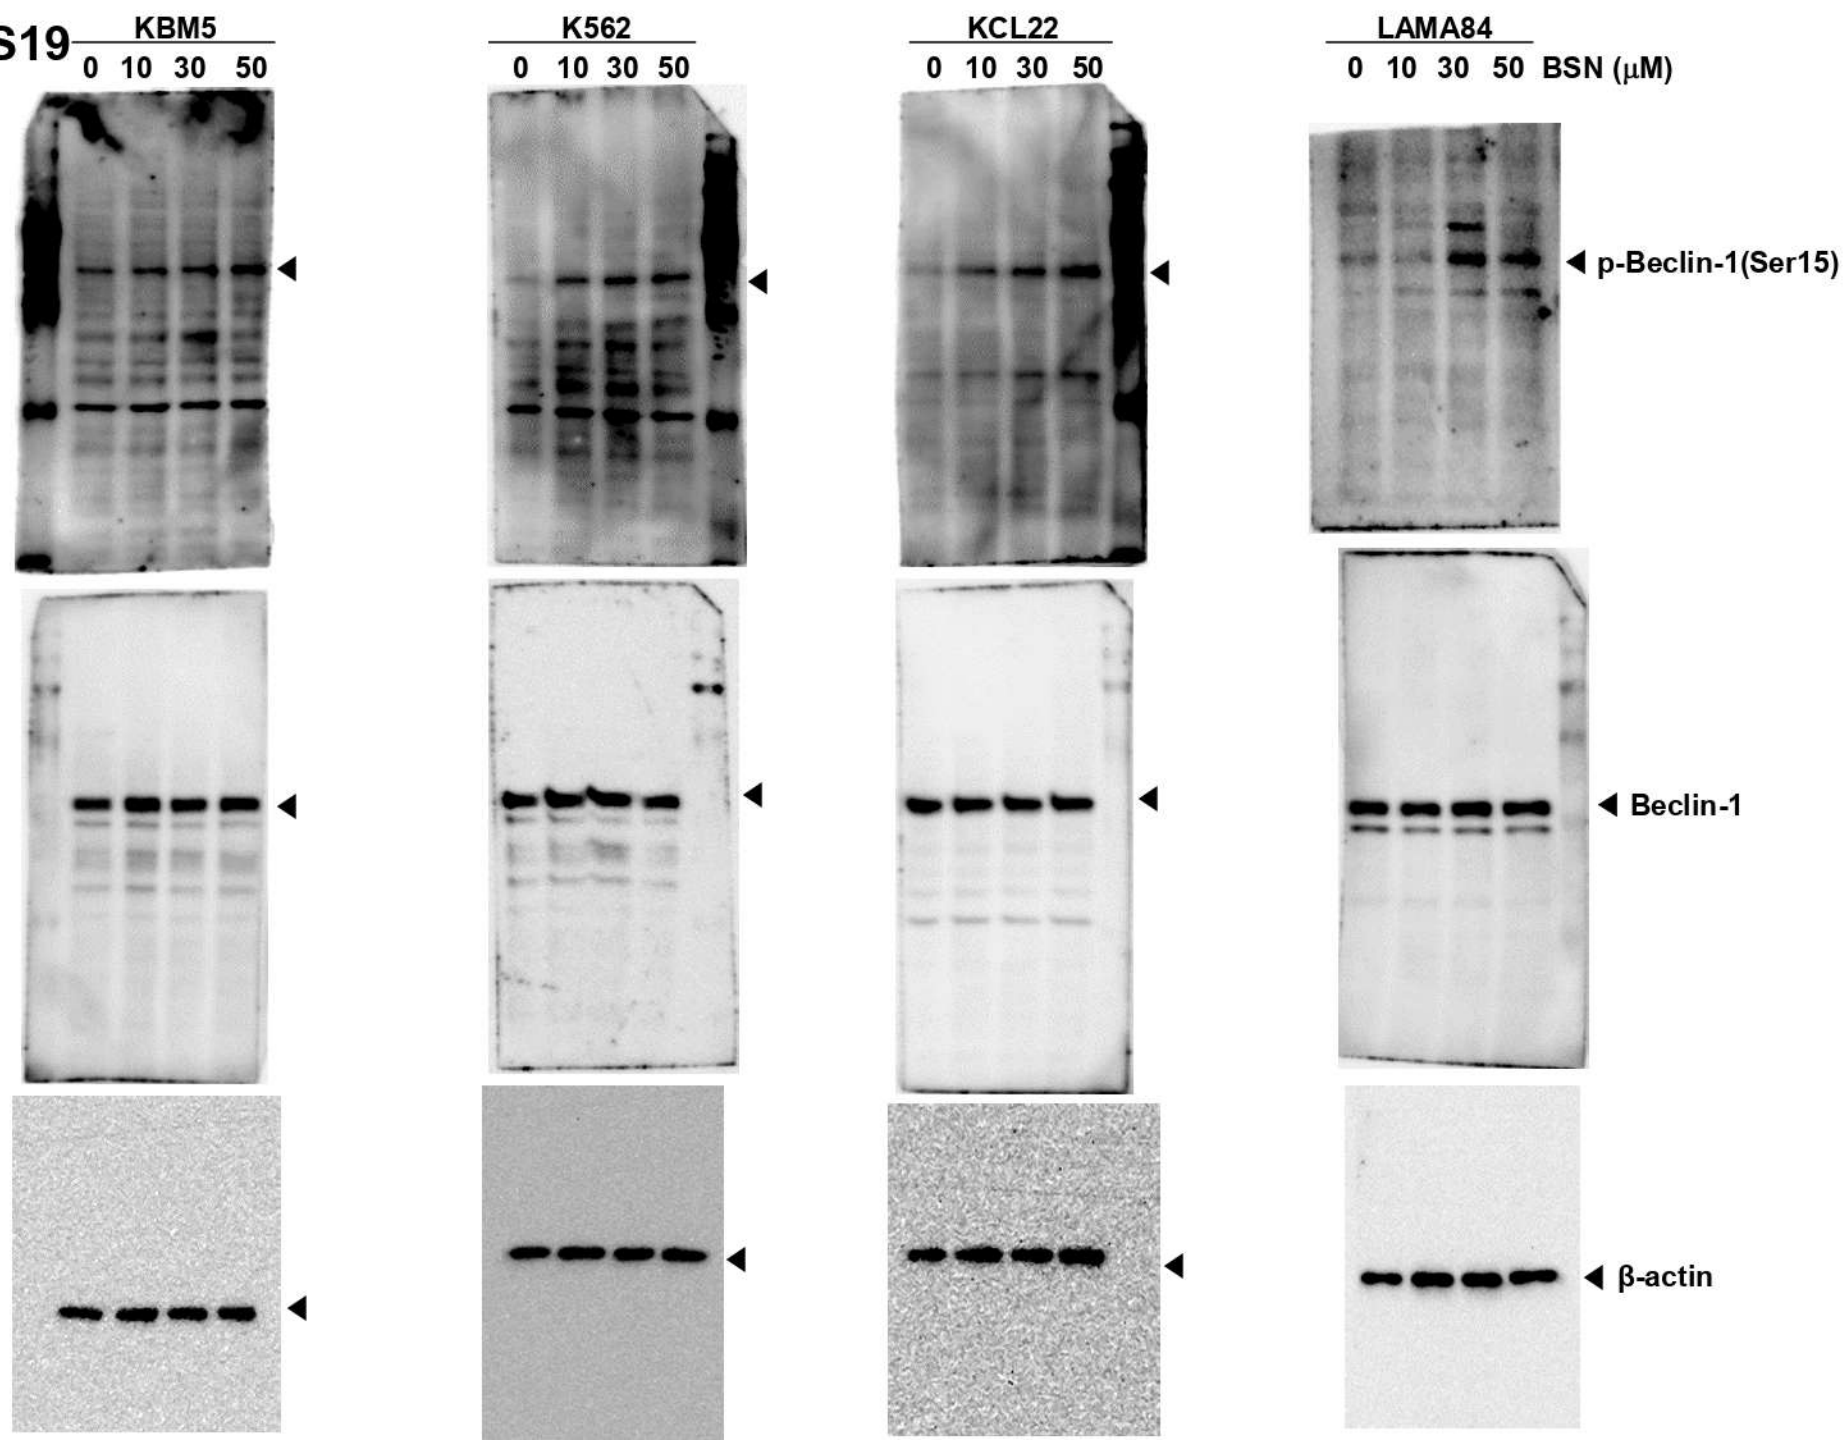

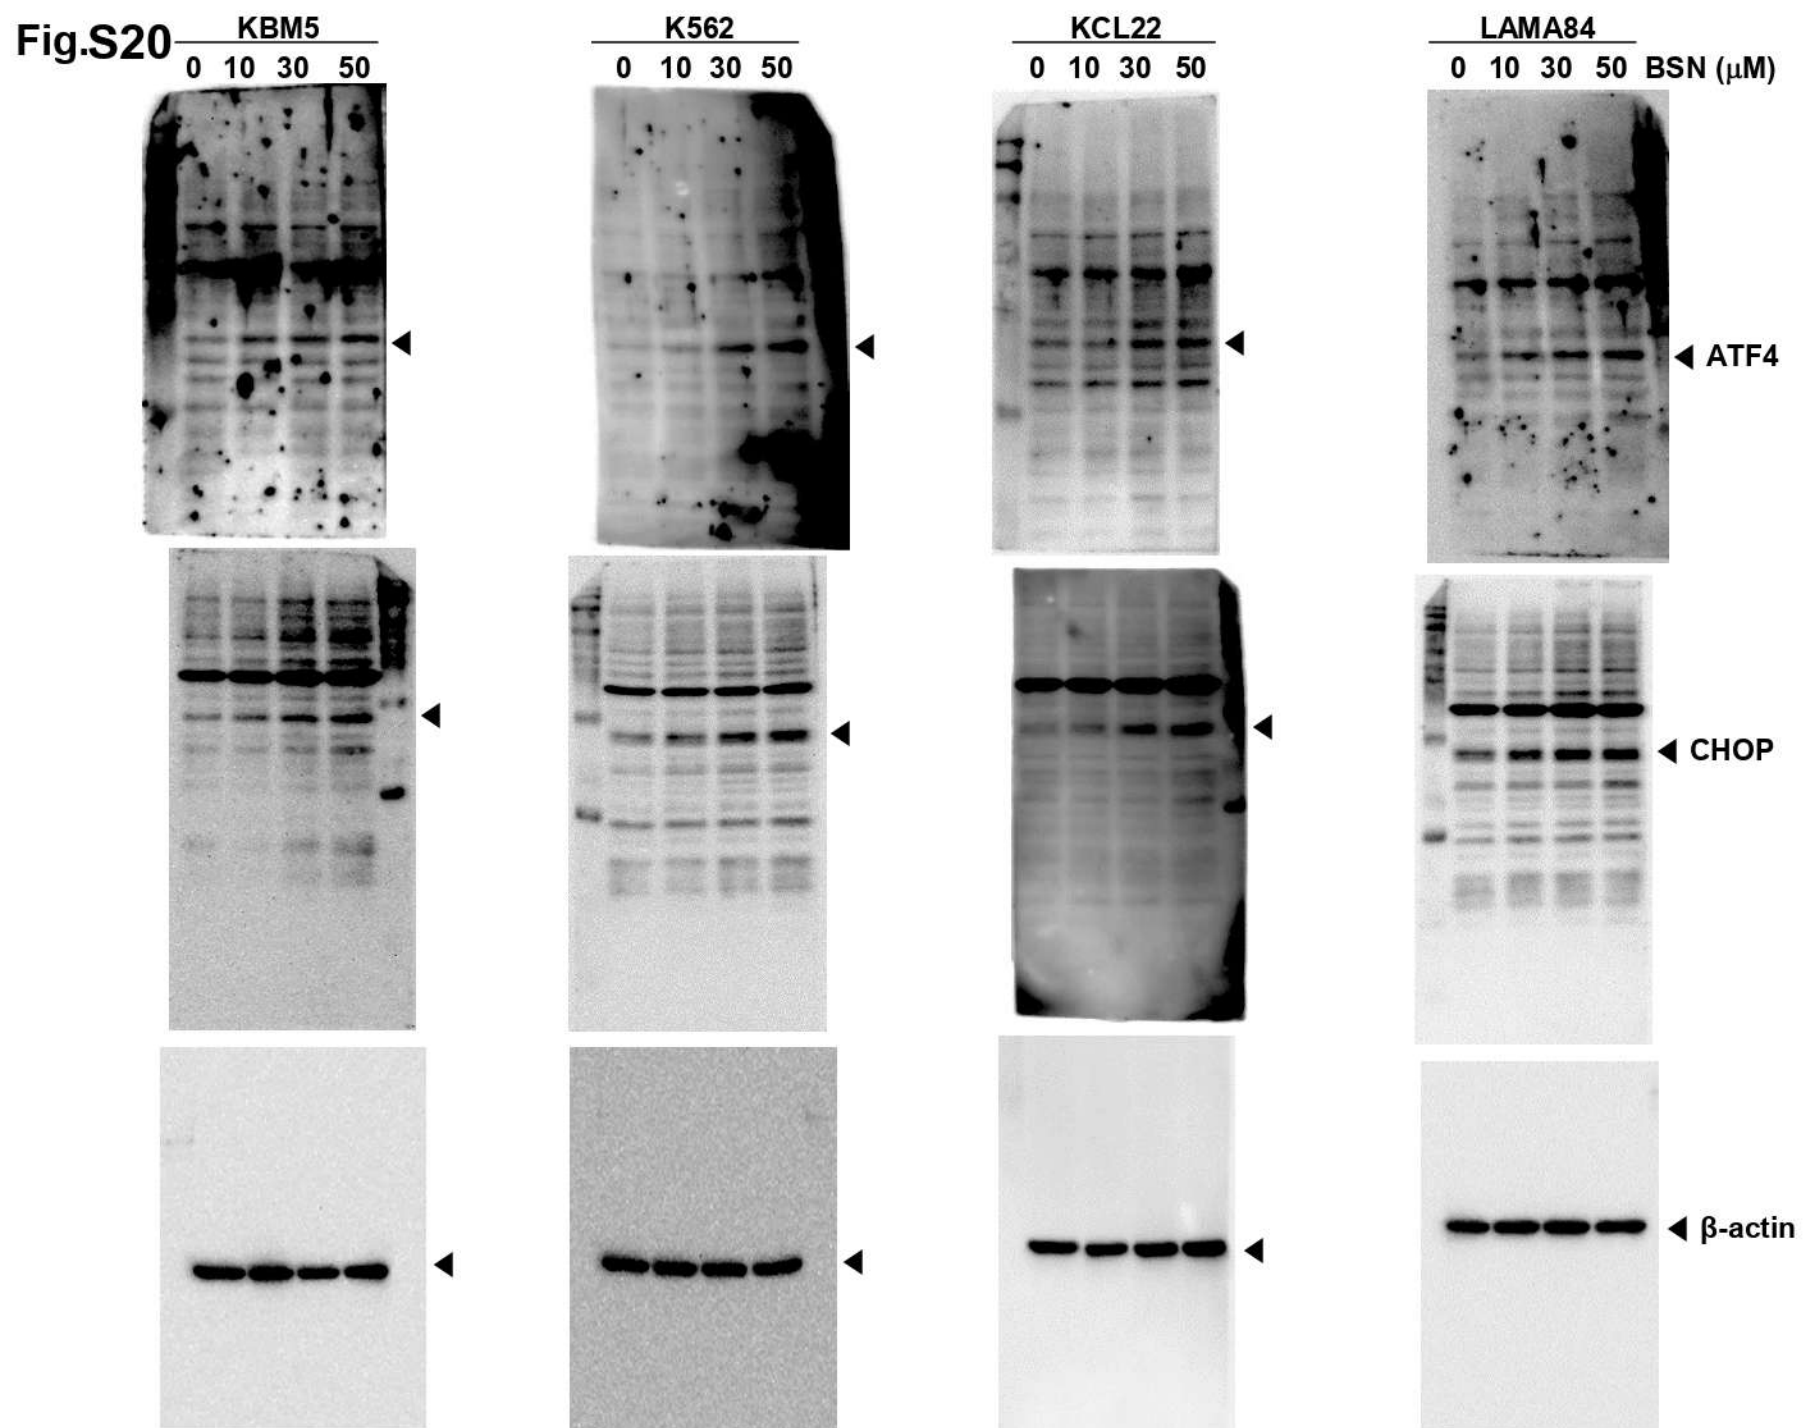

**Fig. S21**

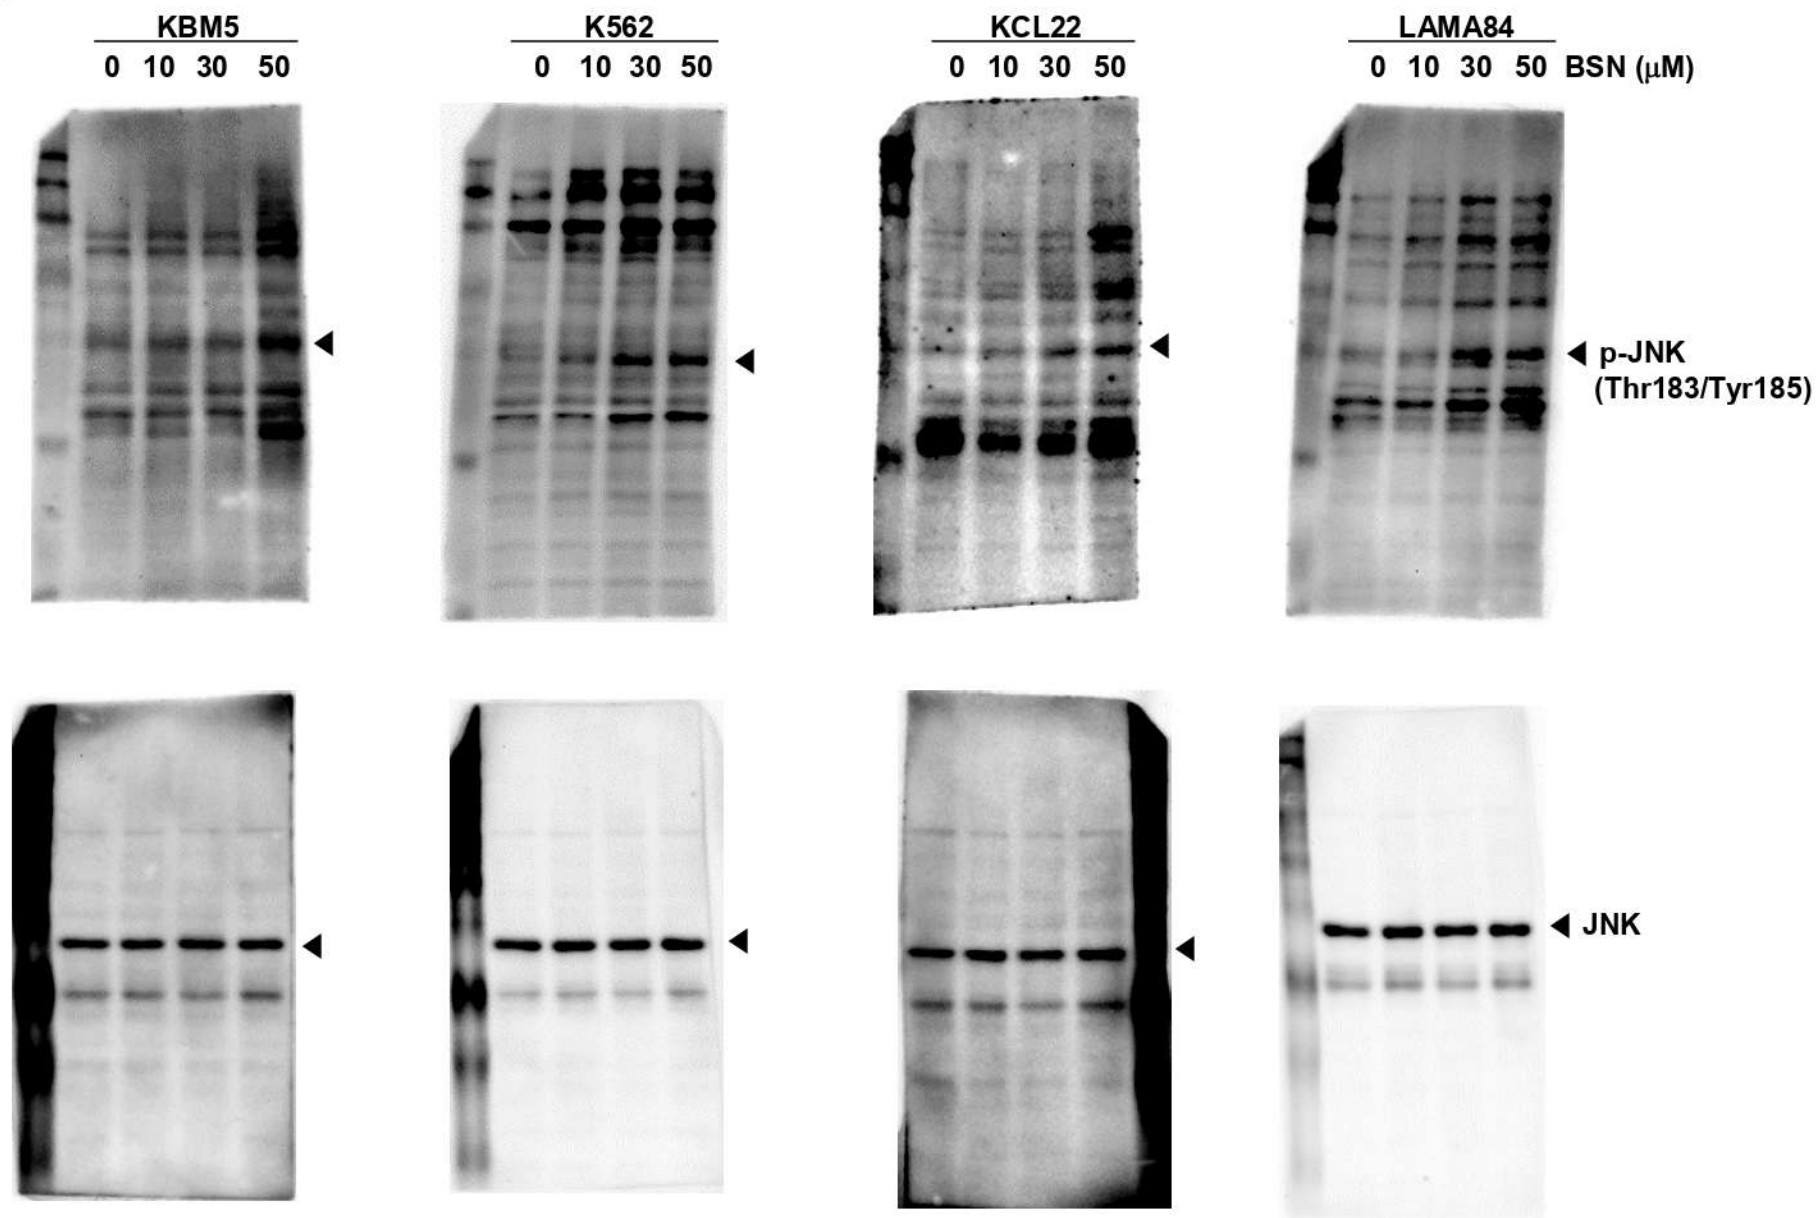

**Fig.S22**

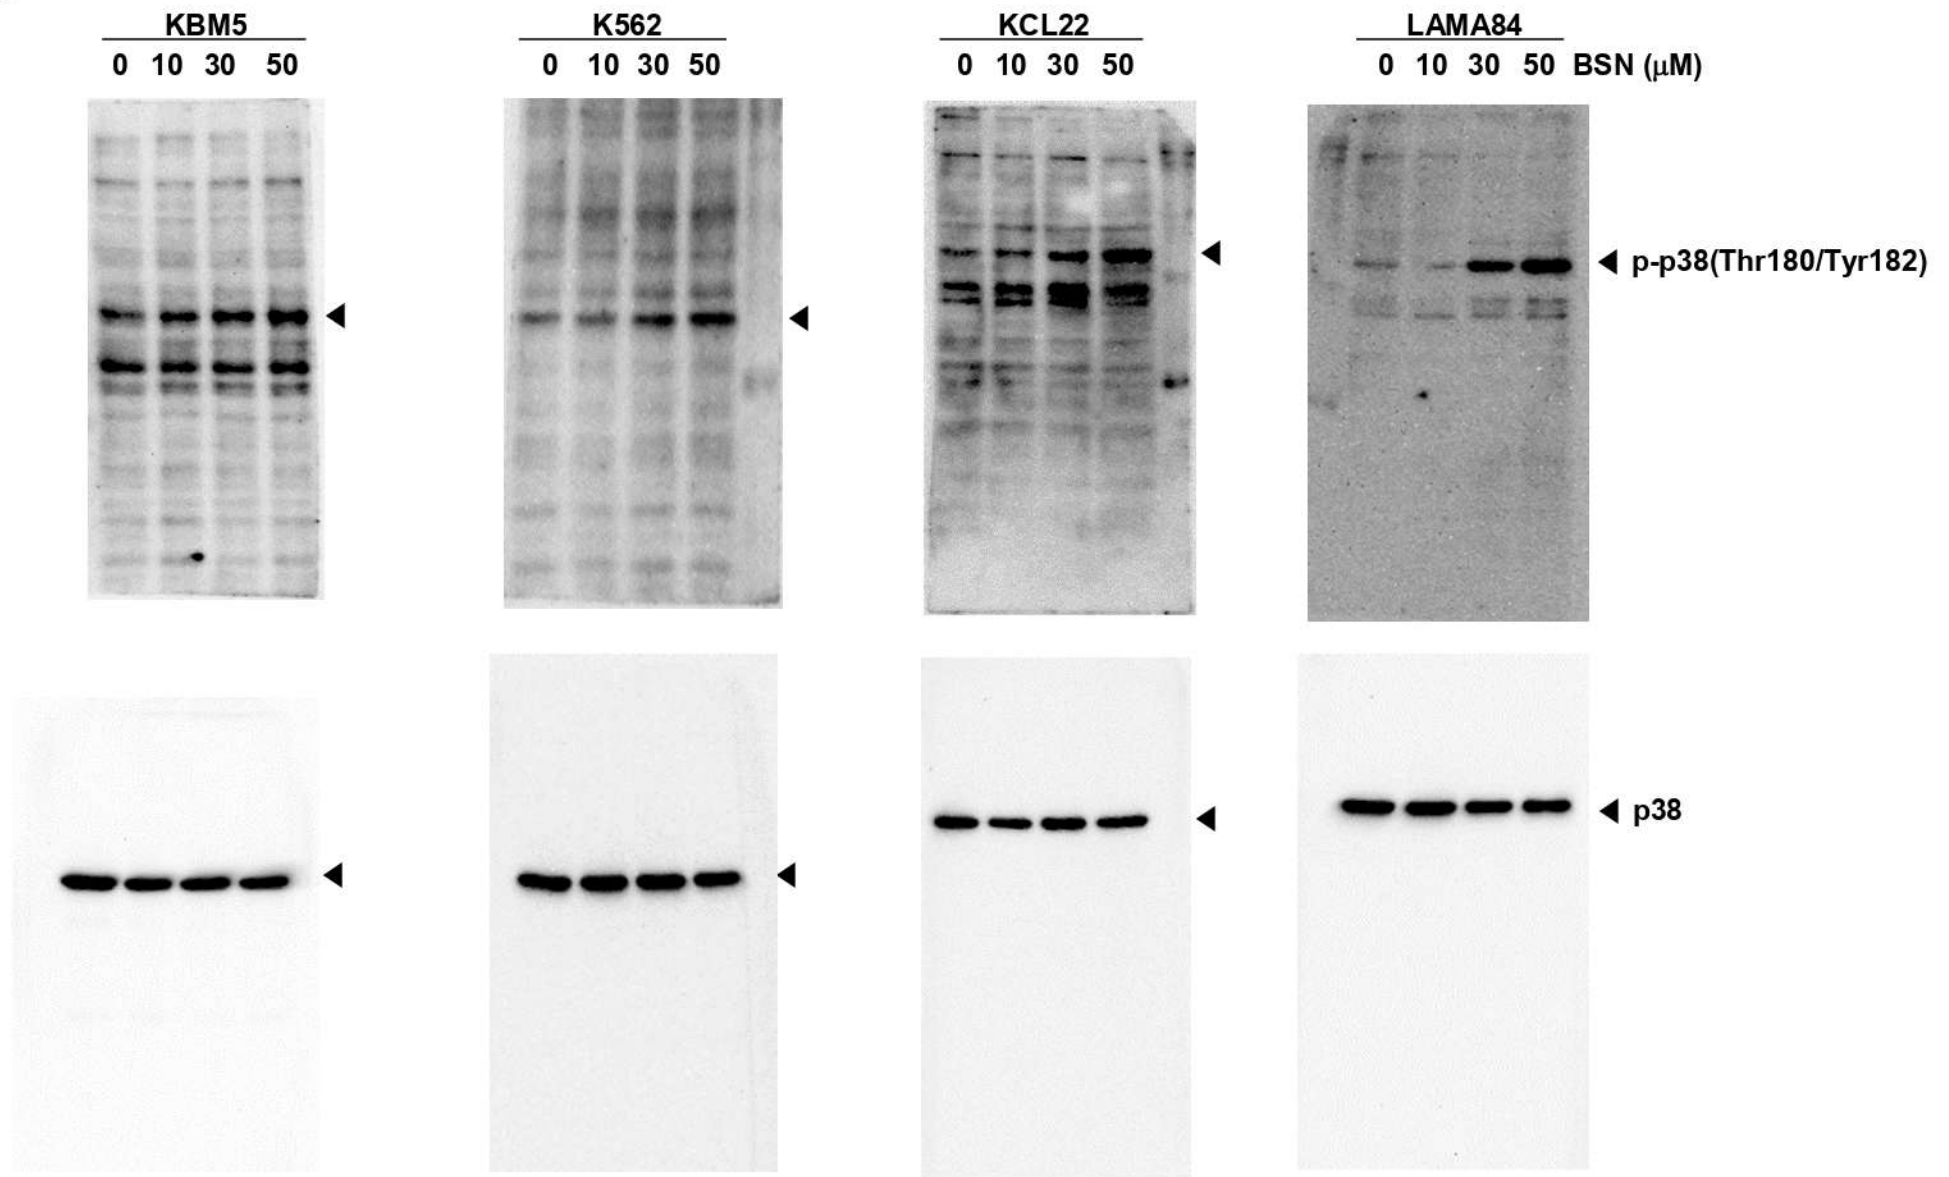

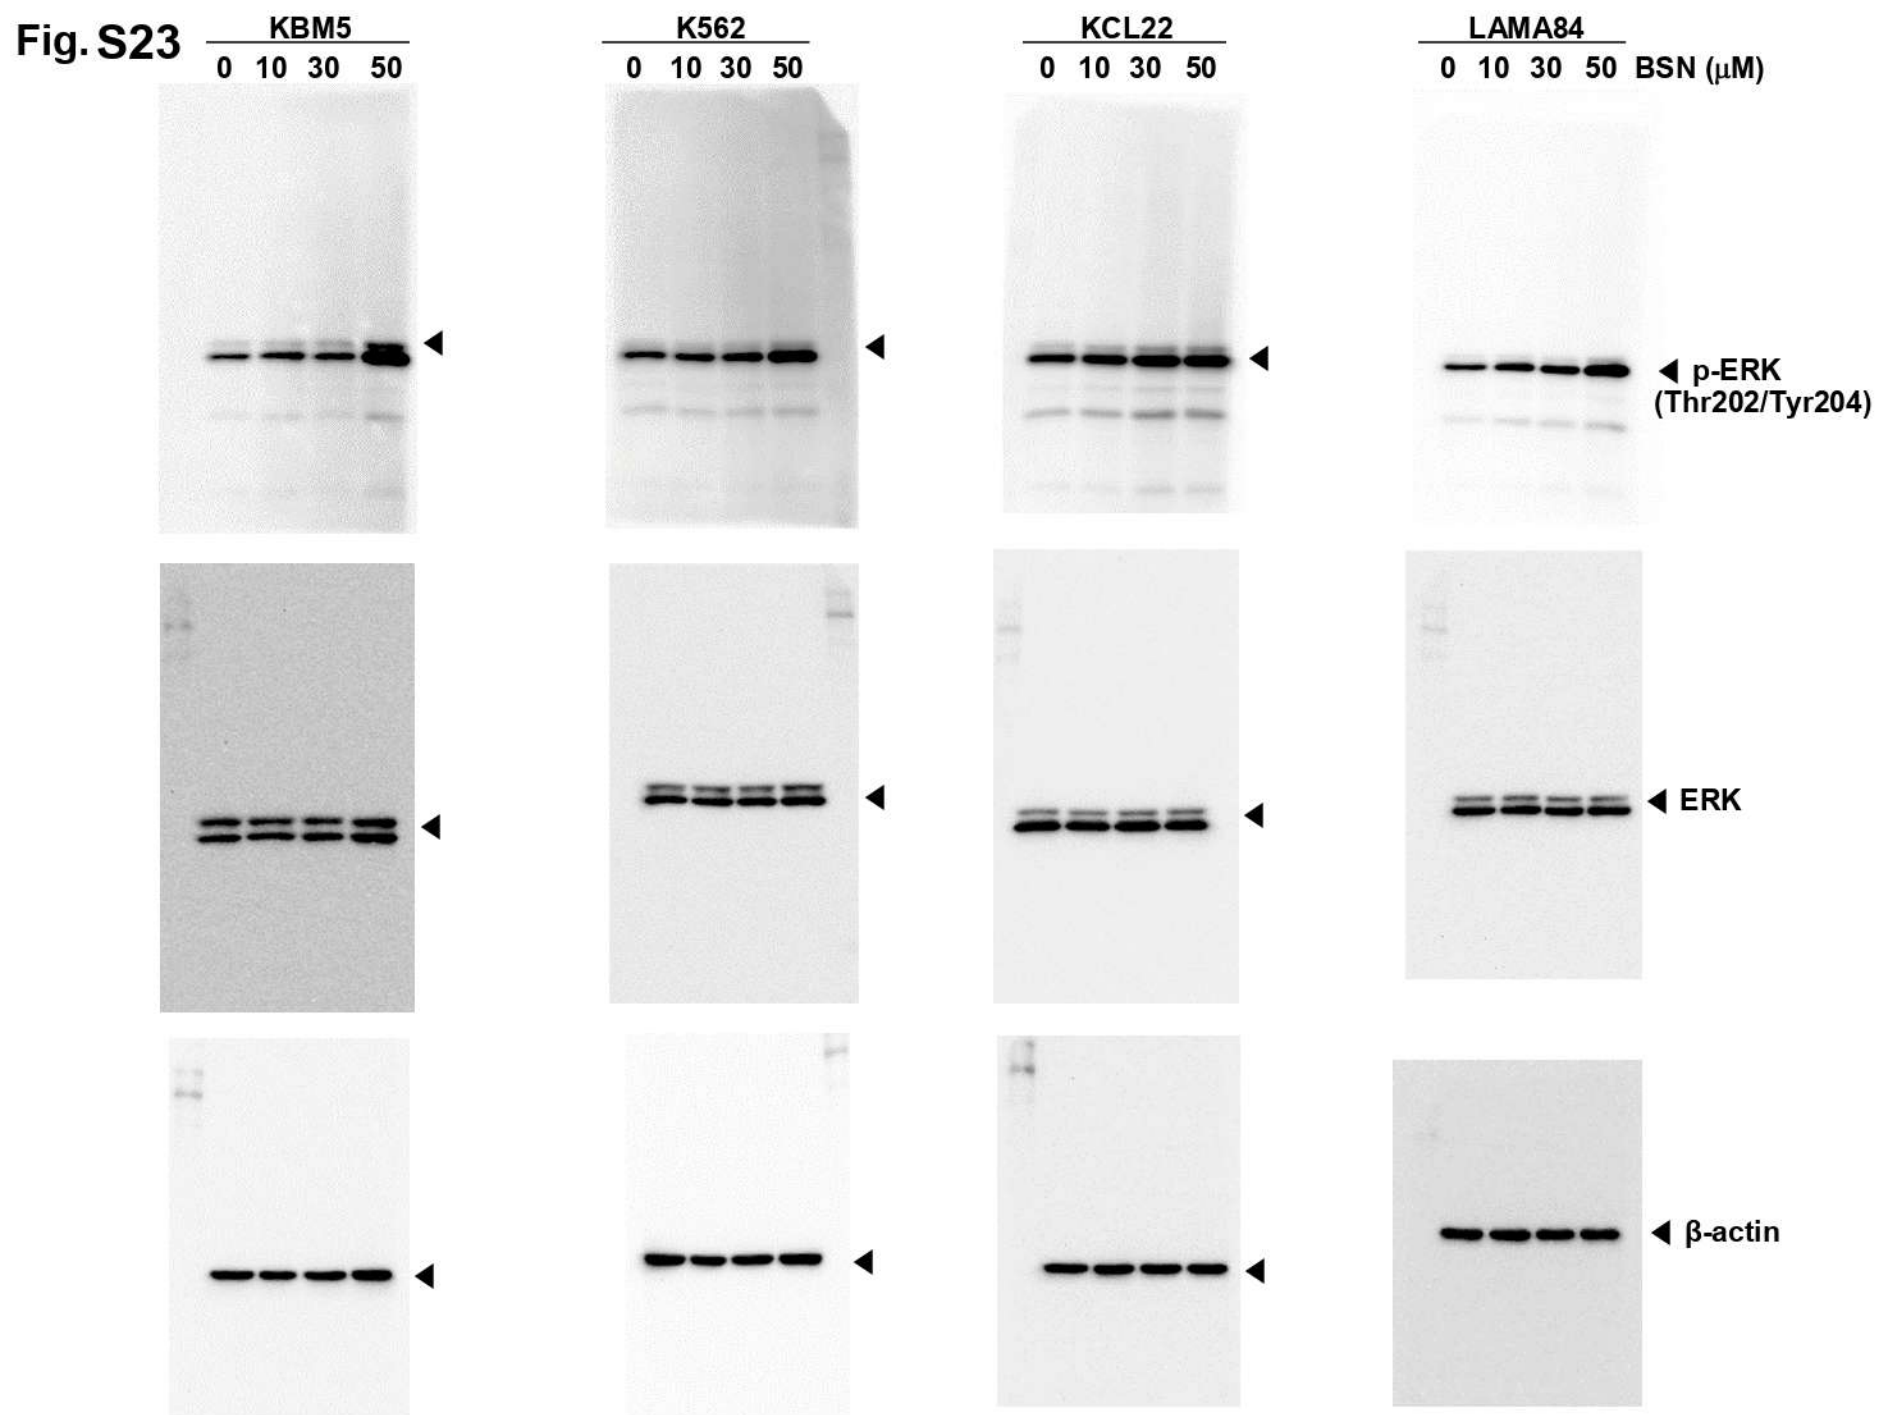

**Fig. S24**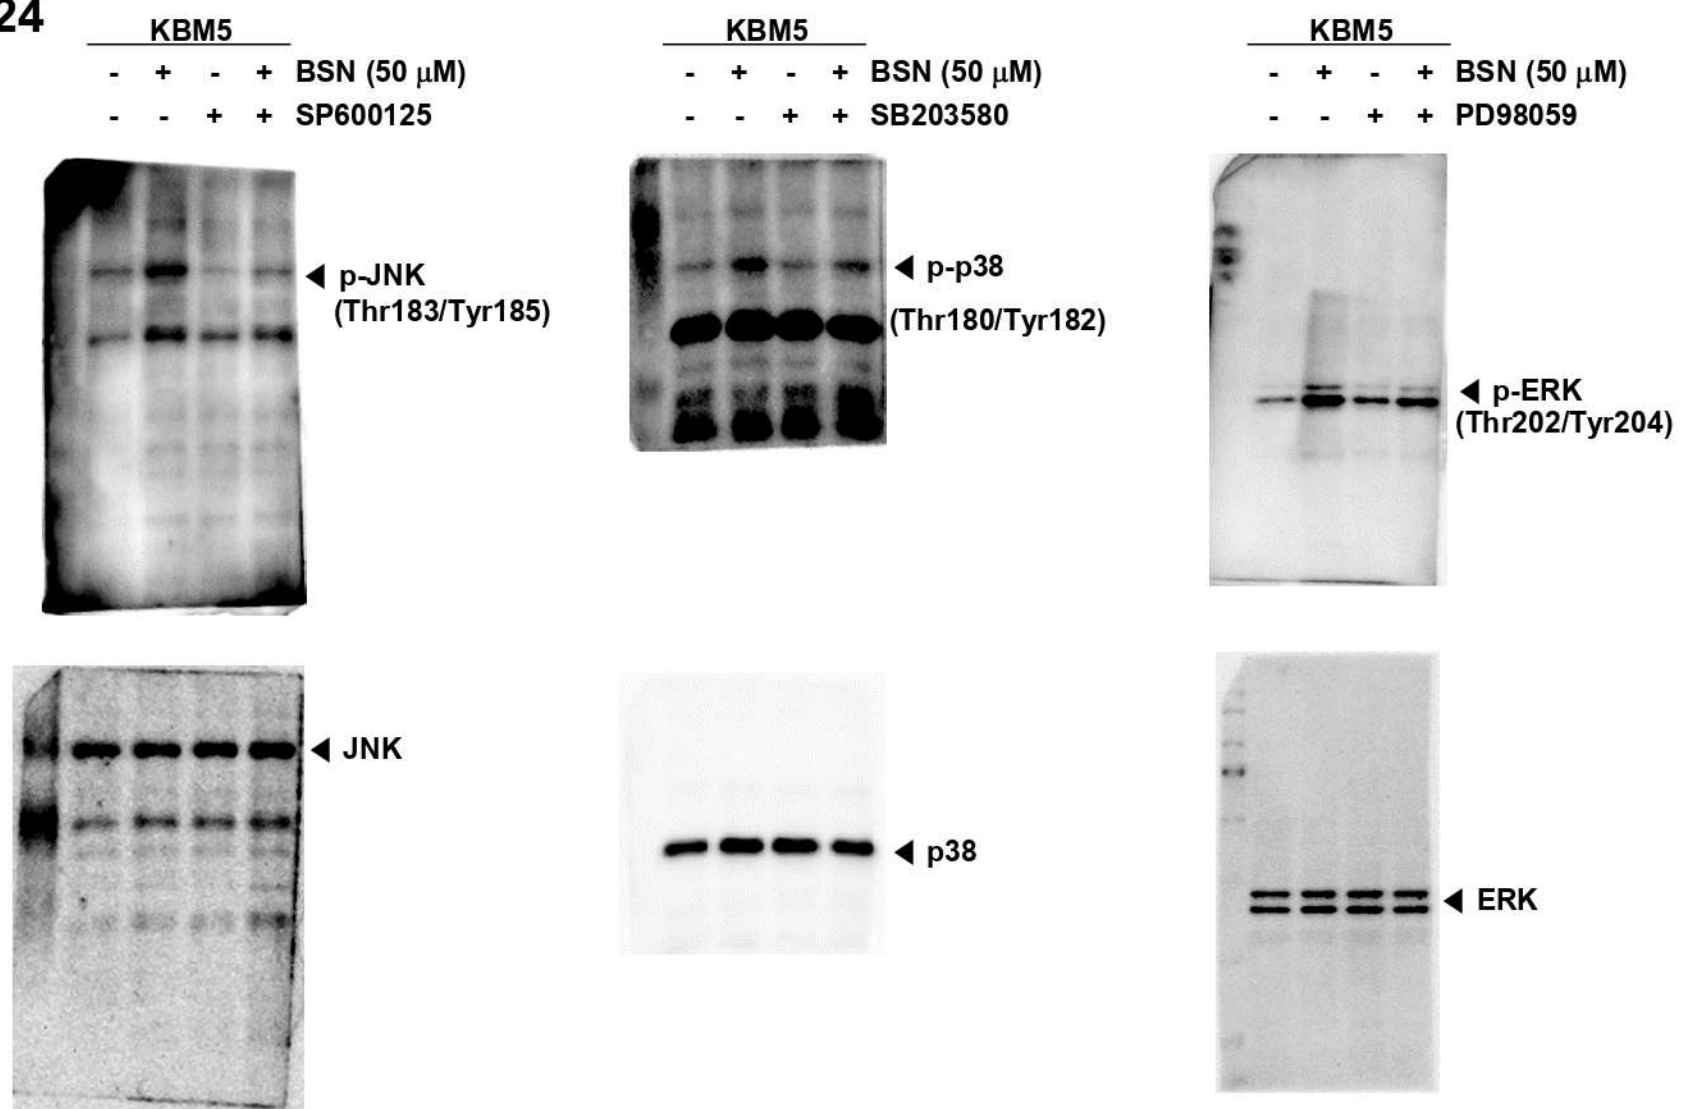

**Fig.S25**

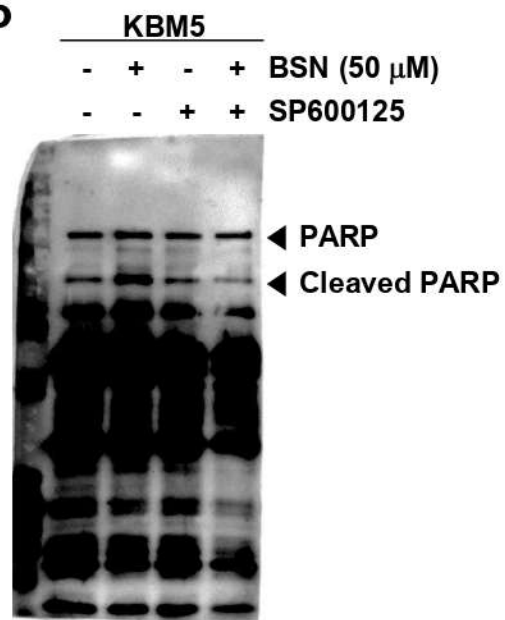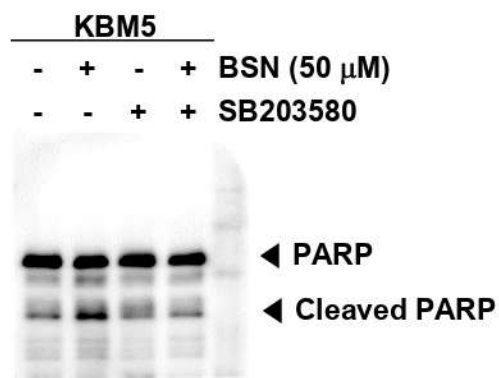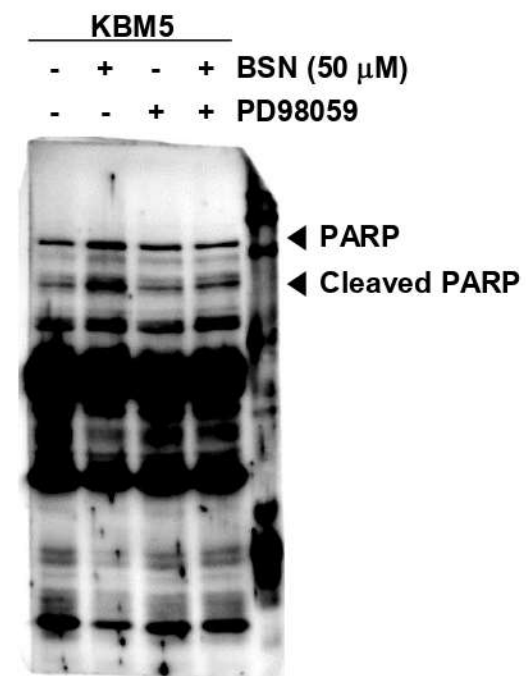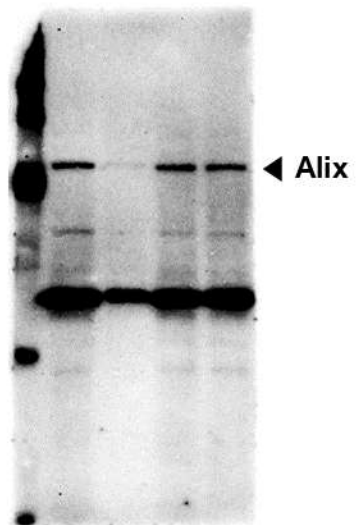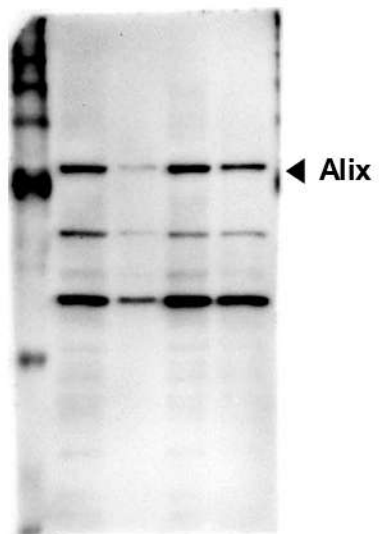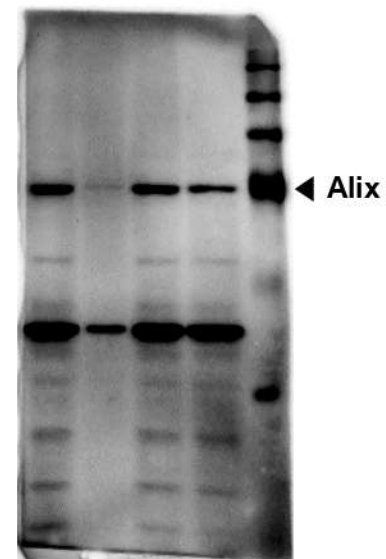

**Fig.S26**

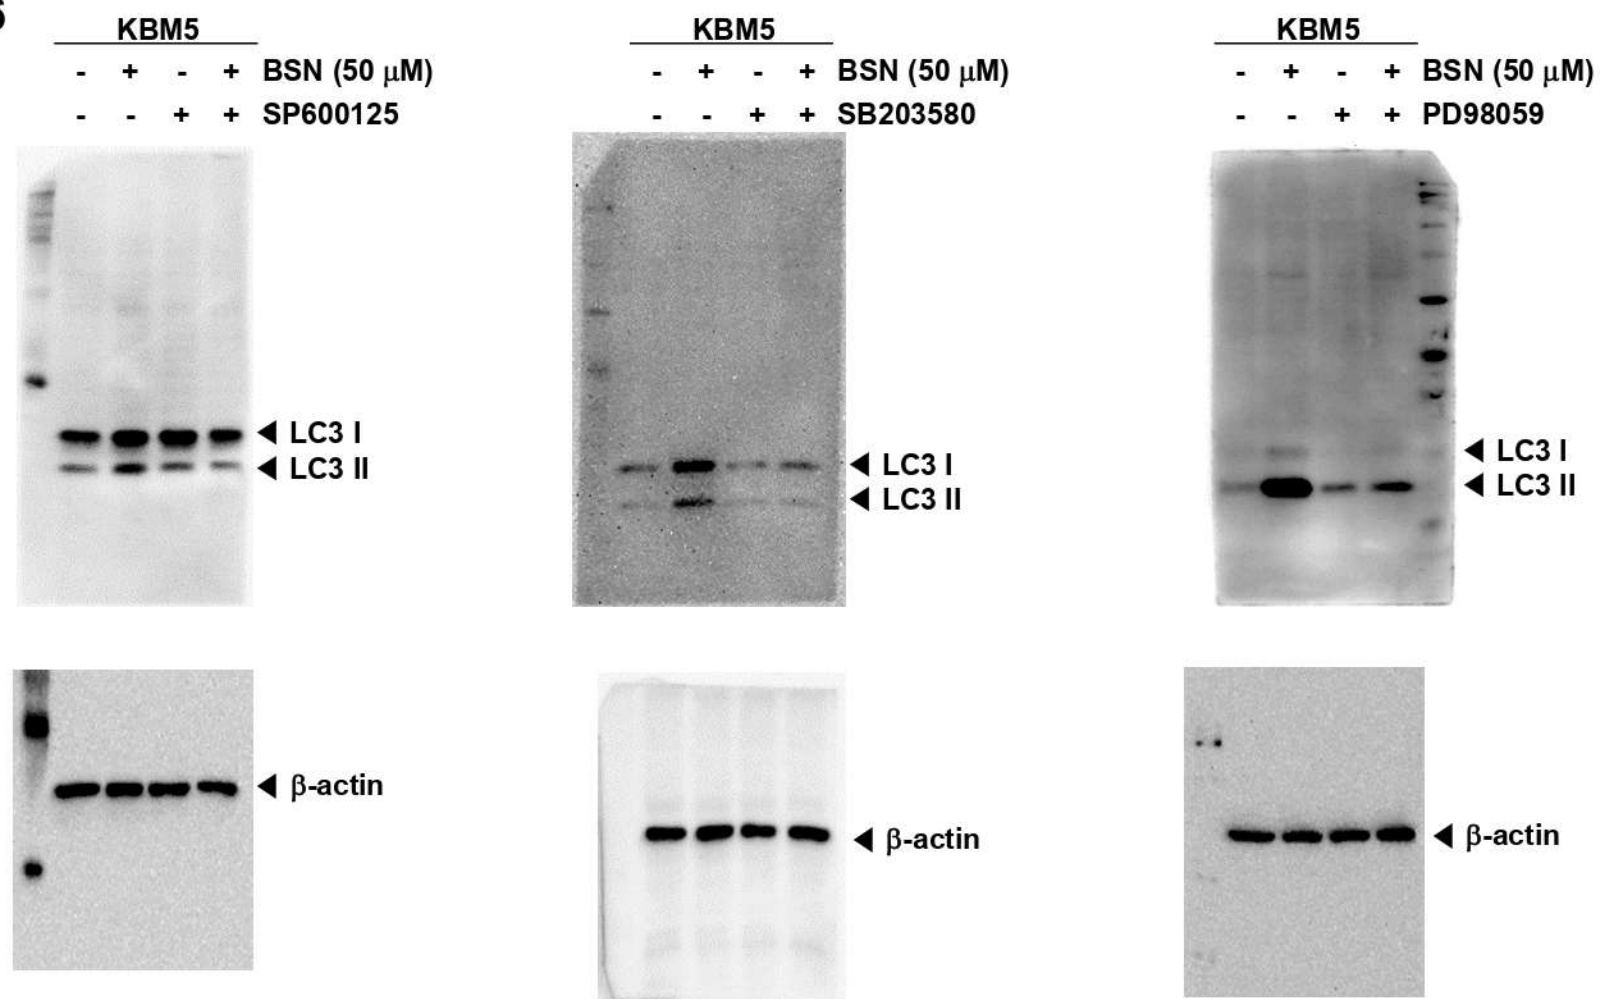

**Fig. S27**

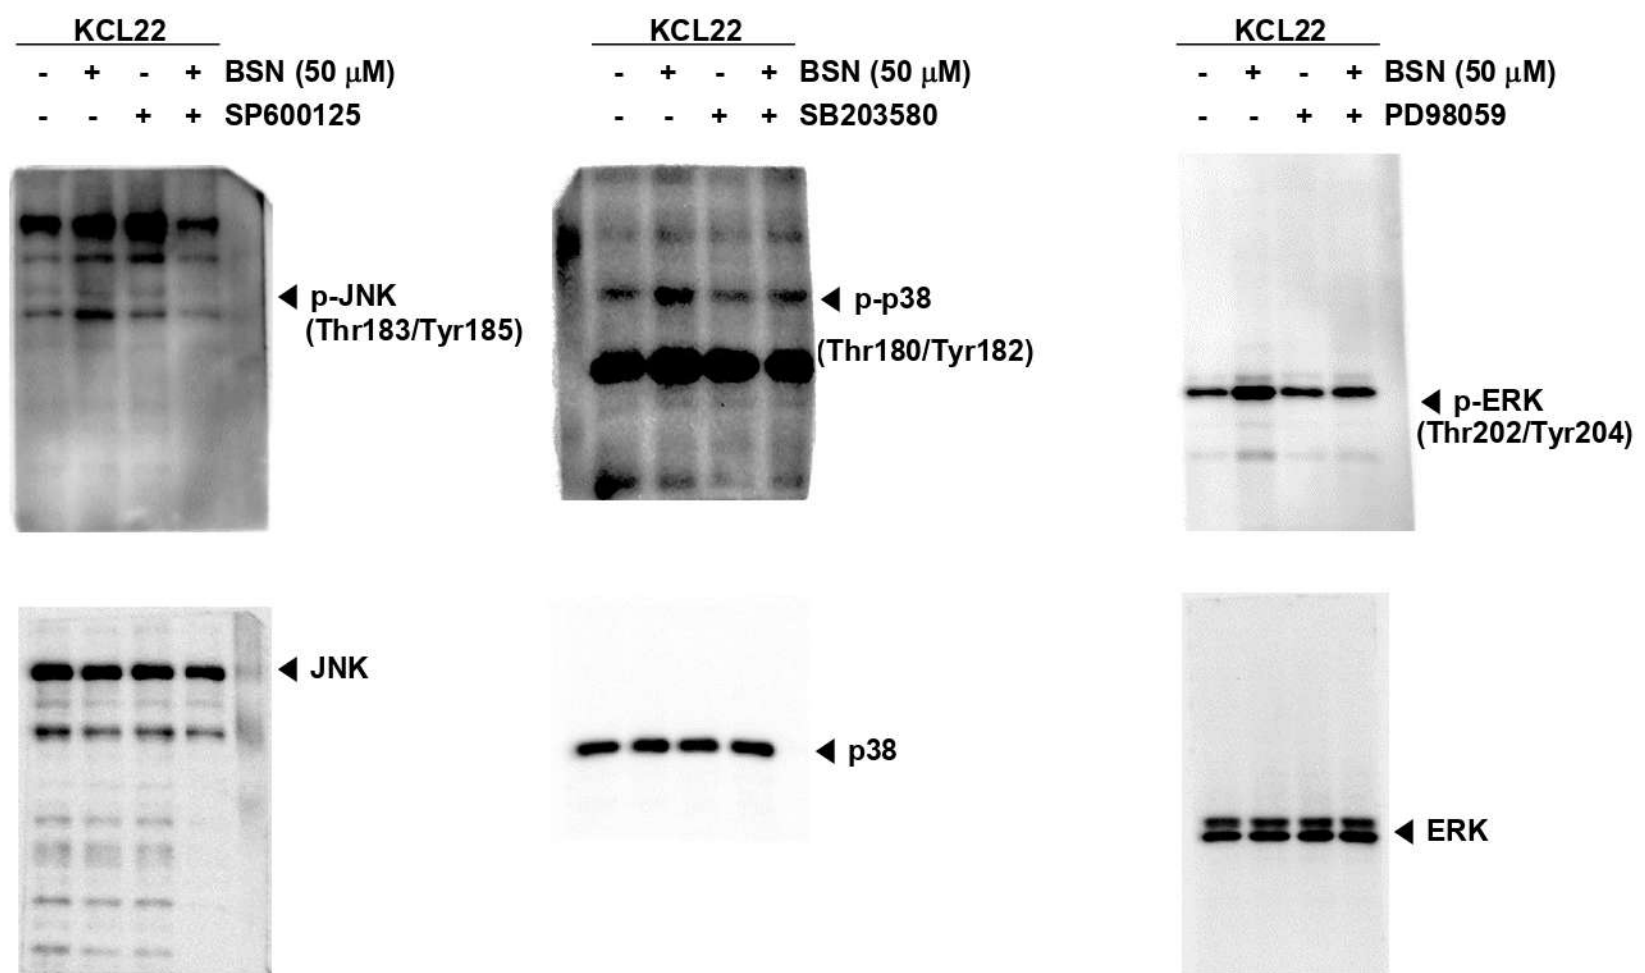

**Fig.S28**

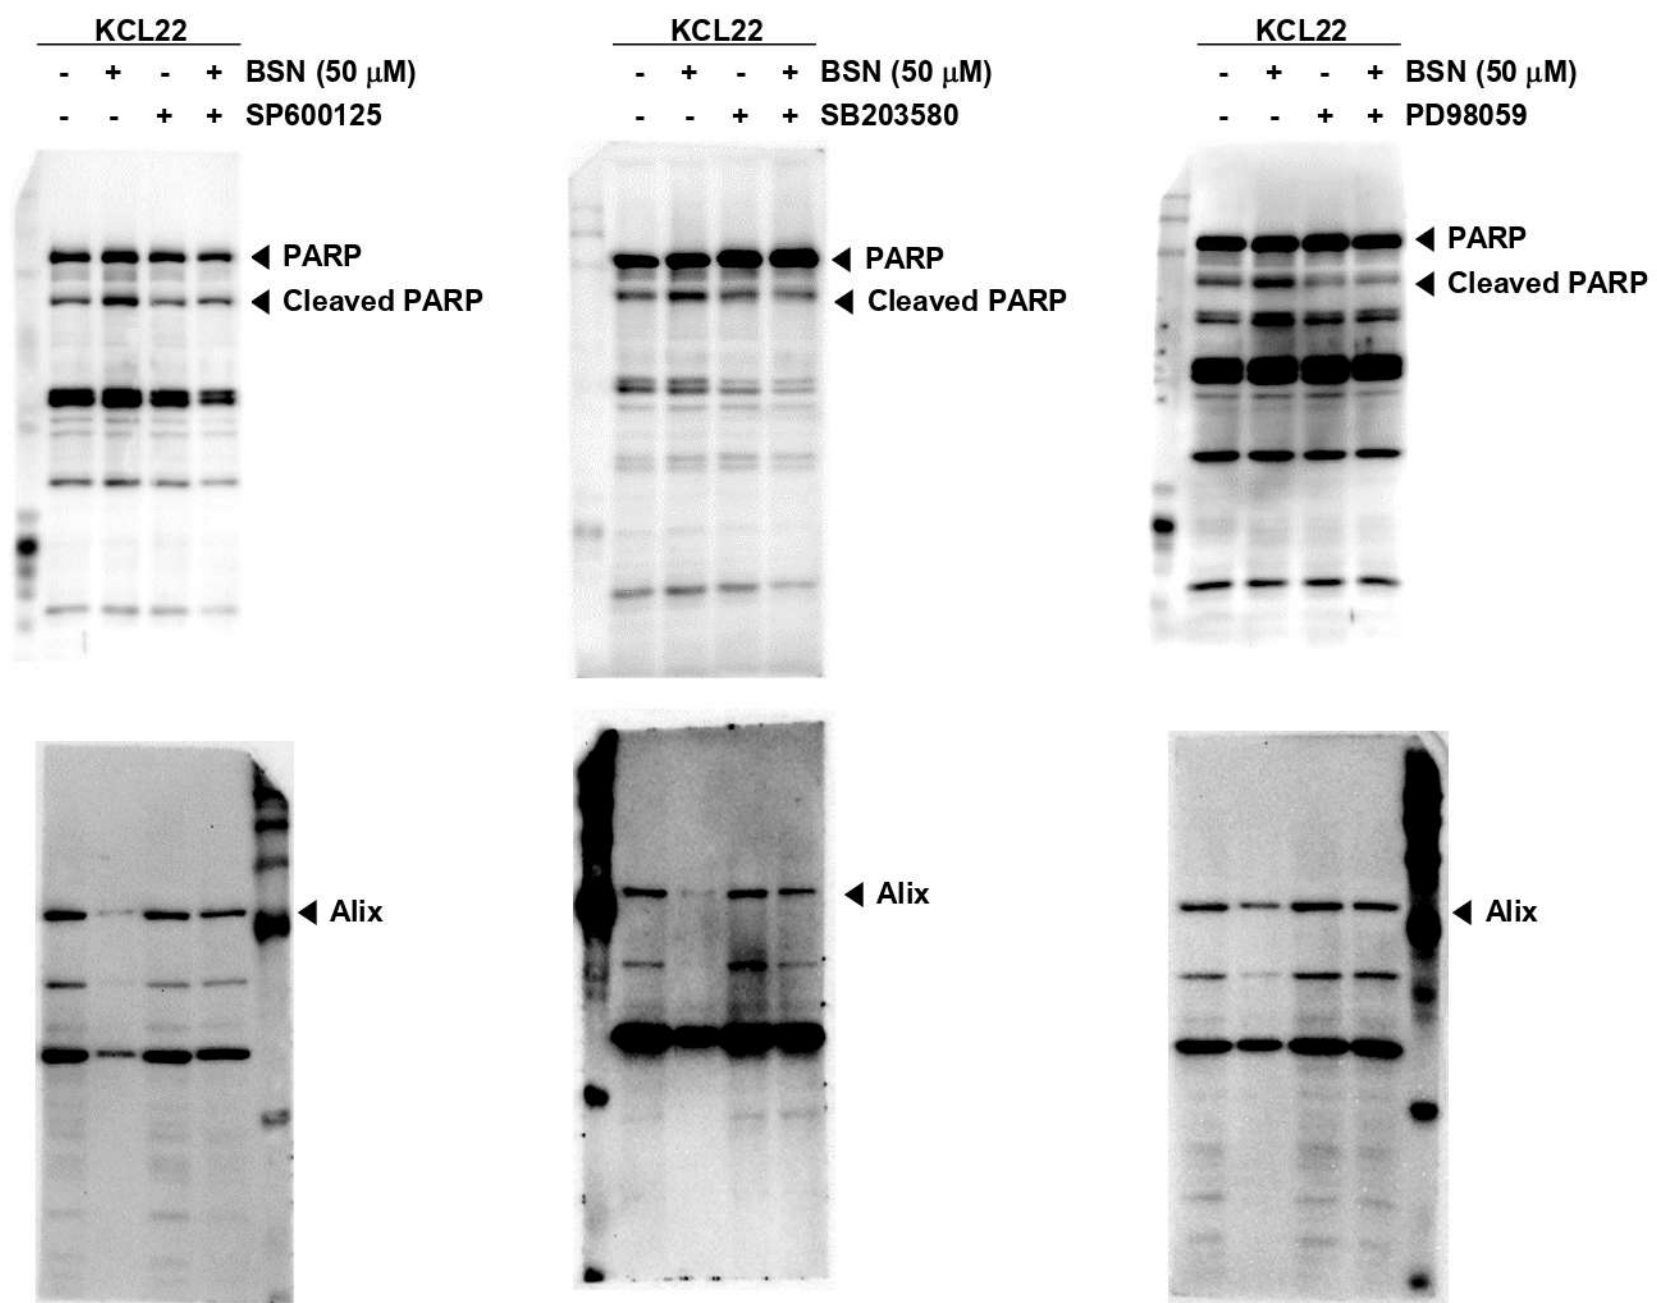

**Fig. S29**

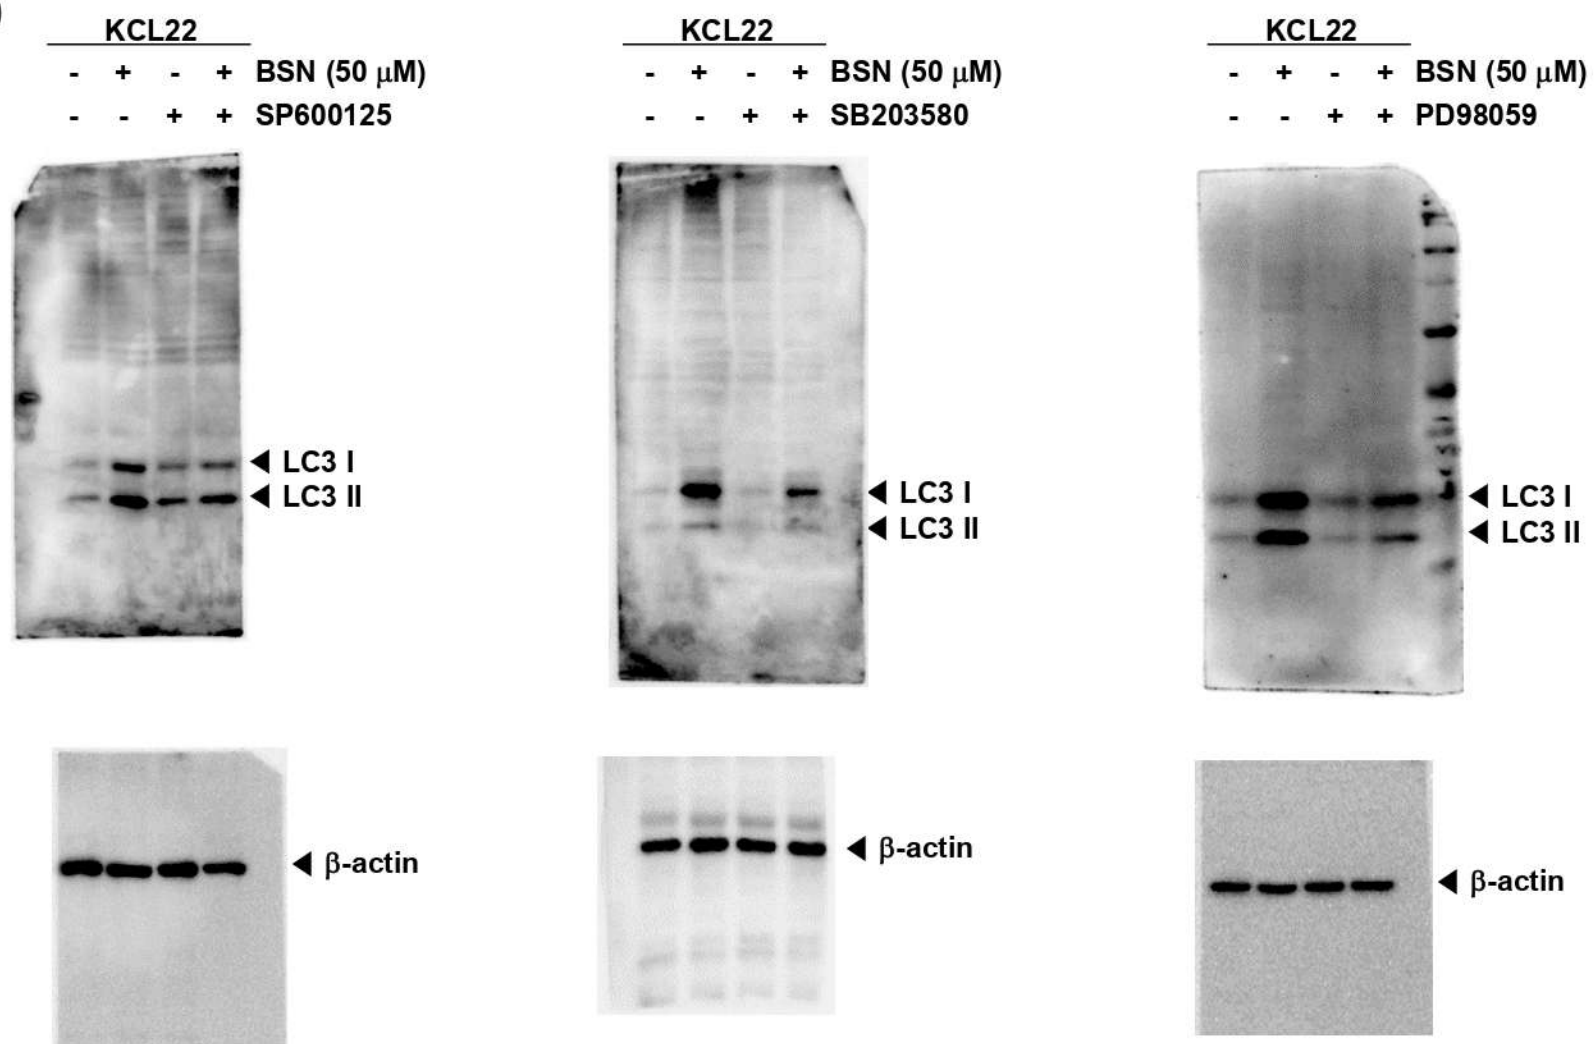

**Fig.S30**

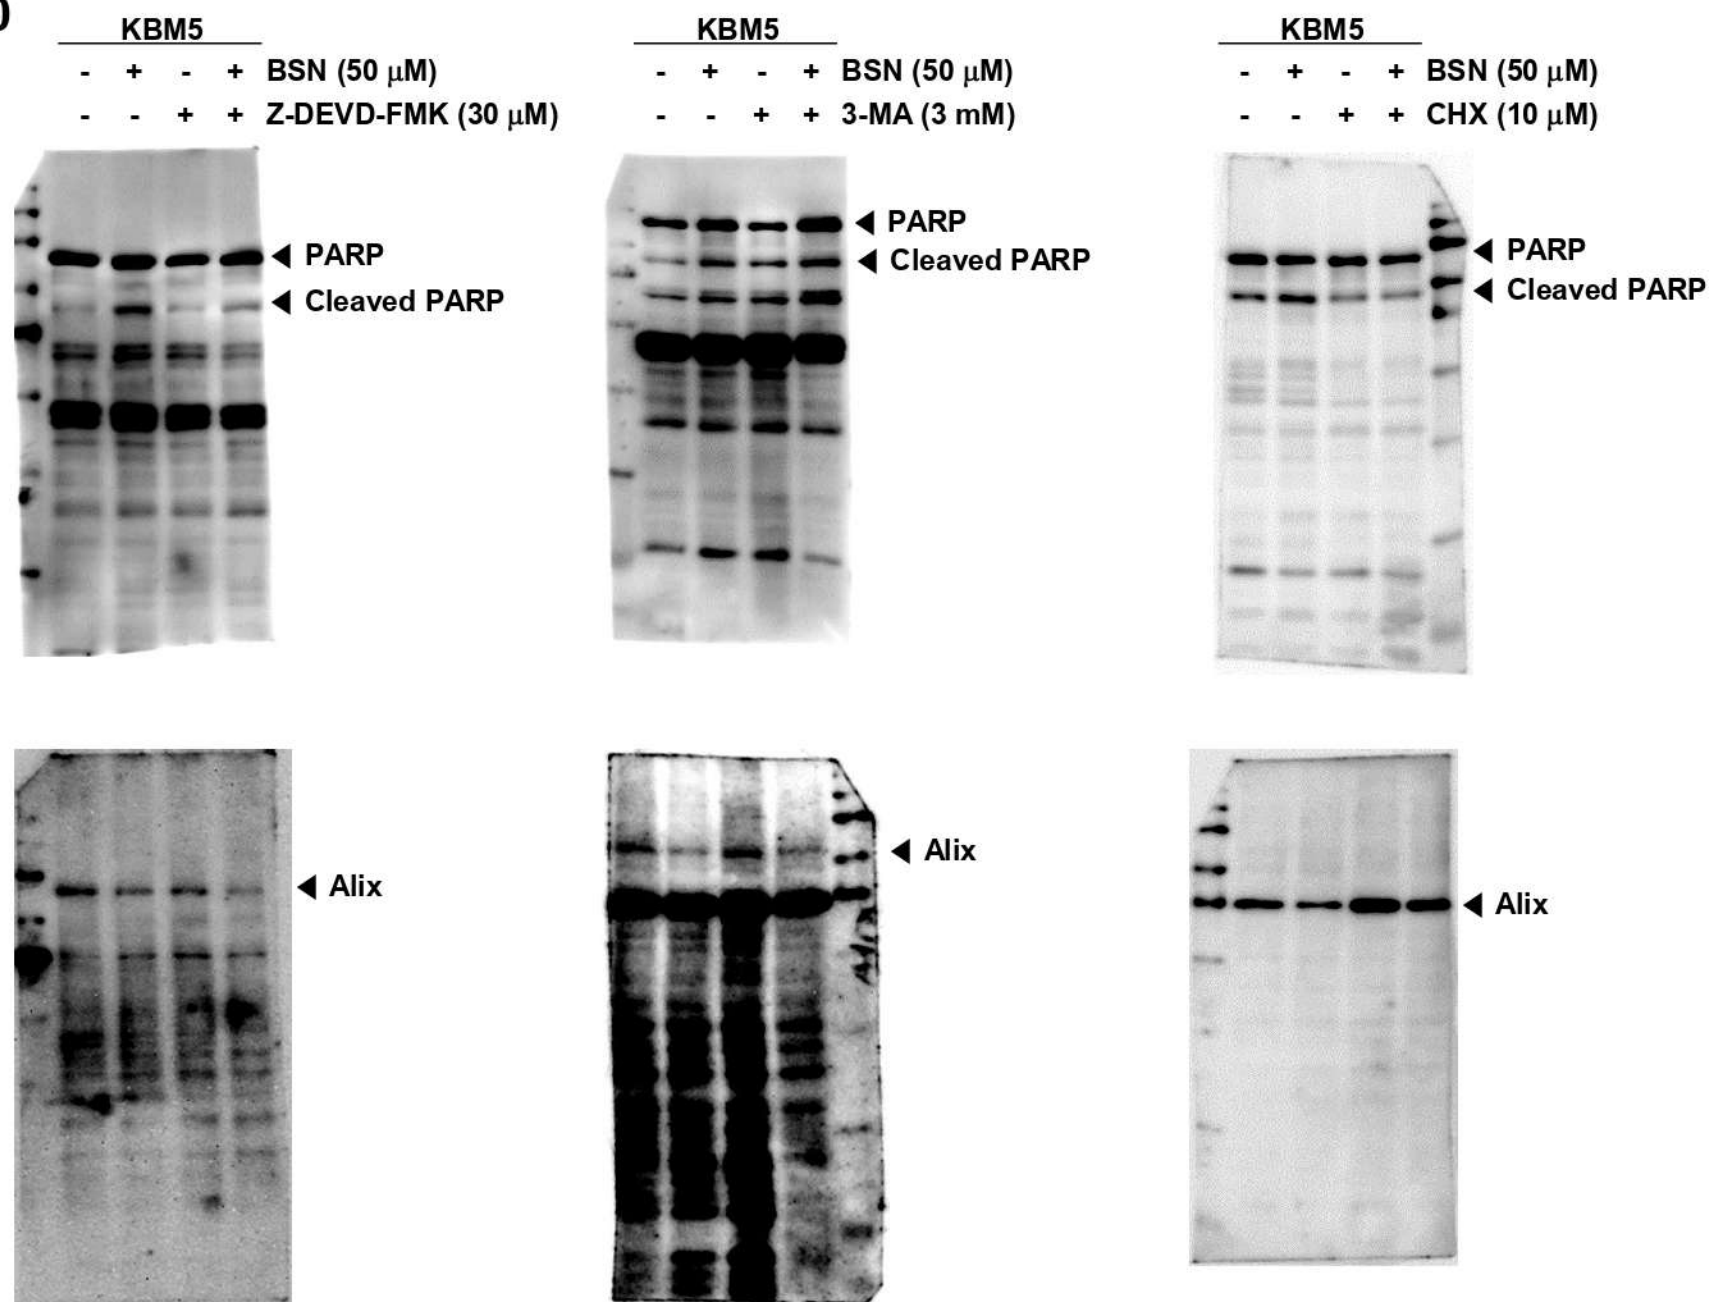

**Fig. S31**

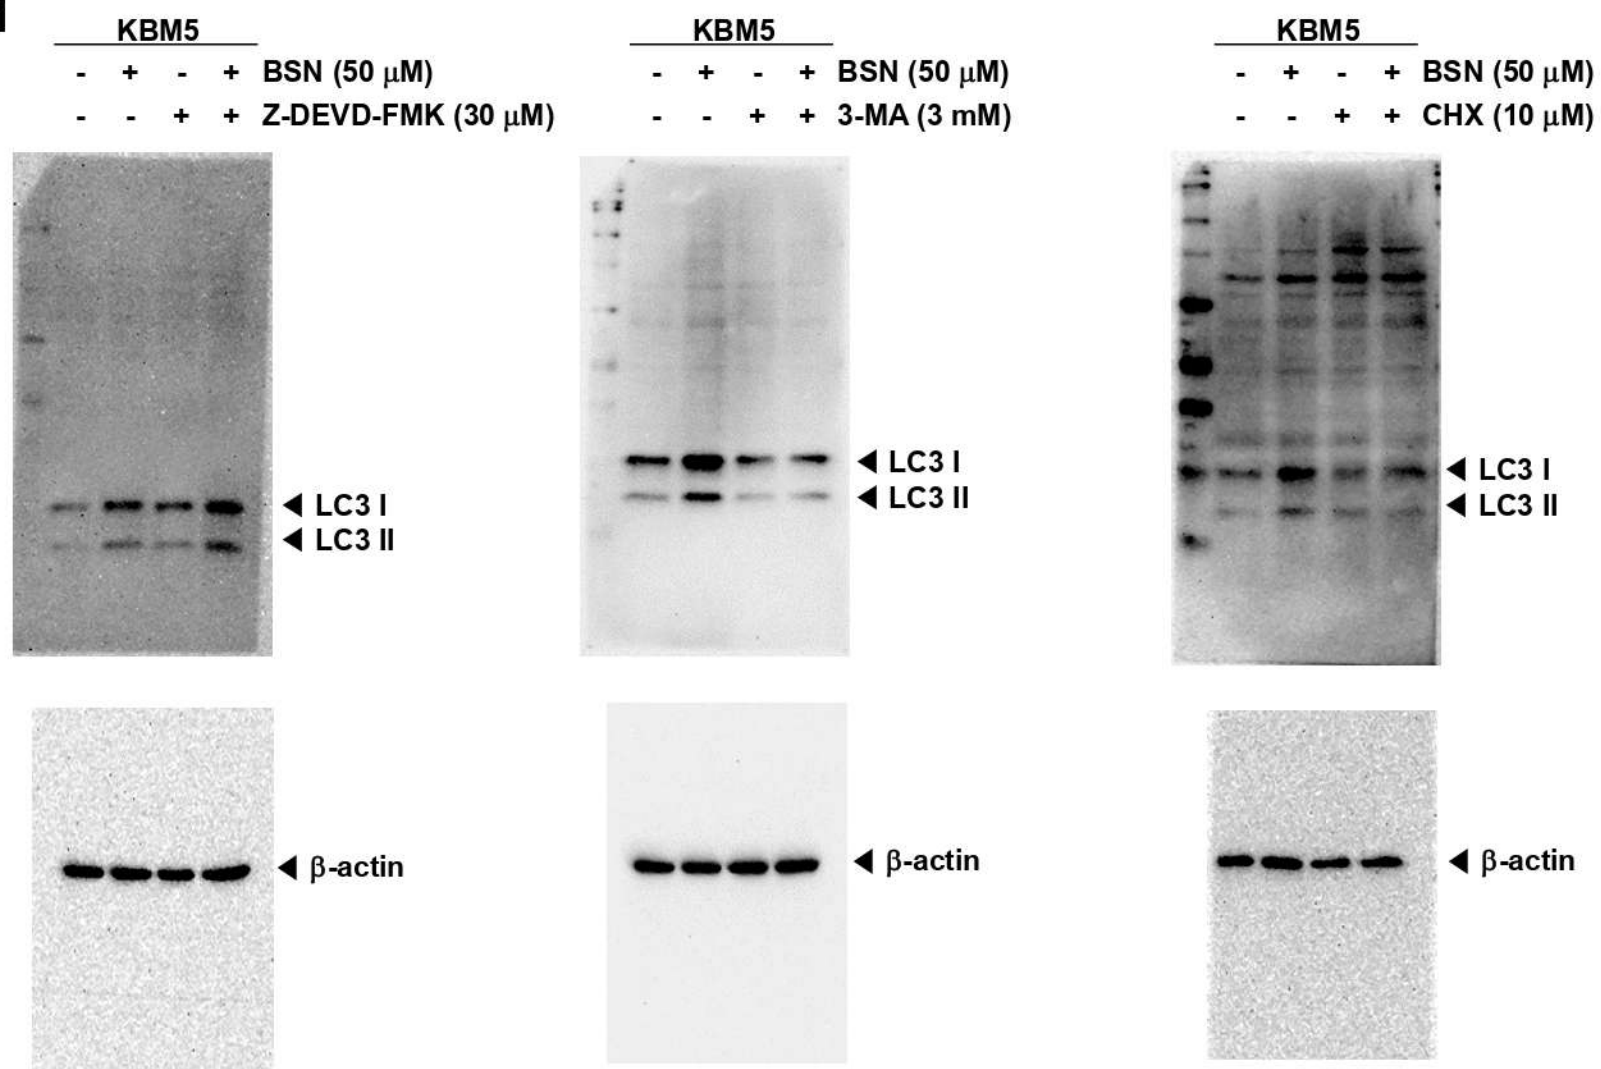

Supplement: s1 [file s1]
